# Supplementary material for: DUSP8 induces TGF-β–stimulated IL-9 transcription and Th9-mediated allergic inflammation by promoting nuclear export of Pur-α
Source: PubMed Central journal article supplement (PMC10617771; doi:10.1172/jci166269), 2023-11-01
Supplement: jci-133-166269-s020.pdf [file jci-133-166269-s020.pdf]

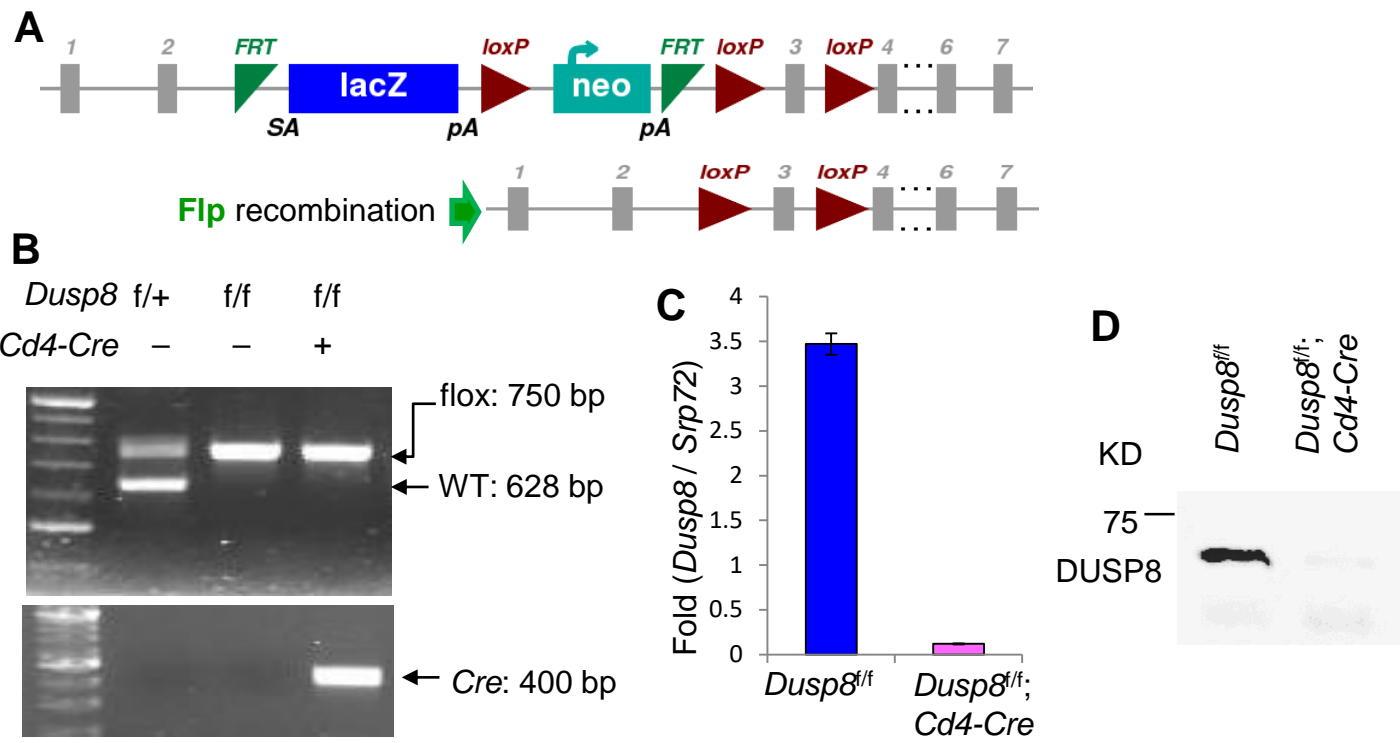

**Supplemental Figure 1. Generation of T-cell-specific *Dusp8* conditional knockout mice.**

(A) The schematic diagram of the *Dusp8* knockout (KO) first allele (reporter-tagged insertion with conditional potential) and the resulting floxed *Dusp8* allele. An insertion vector containing a splice acceptor (SA), a fusion of *lacZ* and *neomycin resistance gene* (*neo*), and a polyadenylation (pA) sequence was inserted in the intron between exons 2 and 3 of the targeted *Dusp8* allele. The KO-first allele is initially a non-expressive form, but can be converted to a conditional floxed allele via Flp recombination. (B) The PCR product of the 750-bp band indicates the floxed *Dusp8* allele; the 628-bp band indicates the WT allele. Genomic DNAs were extracted from the tail of mice. (C) Real-time PCR analyses of *Dusp8* mRNA levels in peripheral blood T cells from 5 mice per group. *Dusp8* mRNA levels were normalized to *Srp72* levels. Means  $\pm$  SD are shown. (D) T-cell-specific deletion of *Dusp8* in T-*Dusp8* cKO mice. Immunoblotting analysis of DUSP8 protein levels in purified peripheral T from T-*Dusp8* cKO (*Dusp8*<sup>f/f</sup>;*Cd4-Cre*) and WT (*Dusp8*<sup>f/f</sup>) mice. Data shown are representative of three independent experiments.

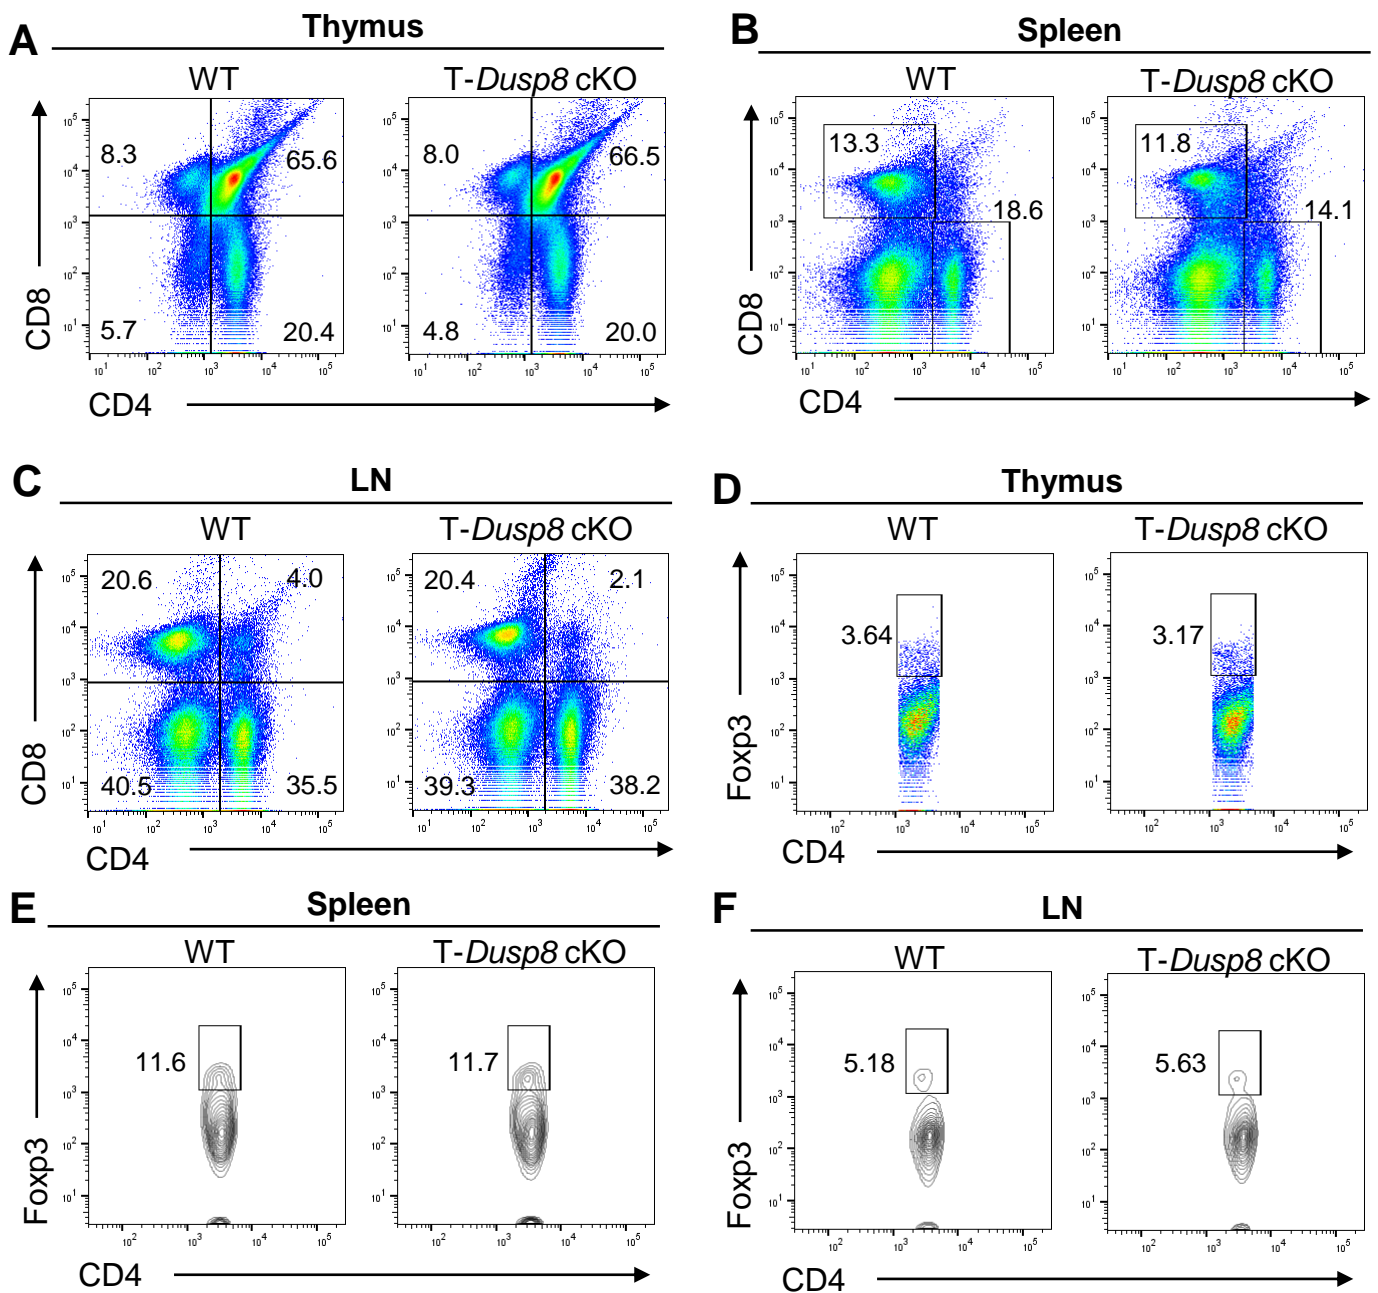

**Supplemental Figure 2. T-*Dusp8* cKO mice display normal T-cell development.** (A-F) Flow cytometry analyses of T cells (A-C) and Treg cells (D-F) from the thymus, spleen, or lymph nodes of 5-week-old T-*Dusp8* cKO or wild-type mice. T-*Dusp8* cKO, T-cell-specific *Dusp8* conditional knockout (*Dusp8*<sup>f/f</sup>; *Cd4-Cre*); WT, wild-type (*Dusp8*<sup>f/f</sup>). Data shown are representative of three independent experiments.

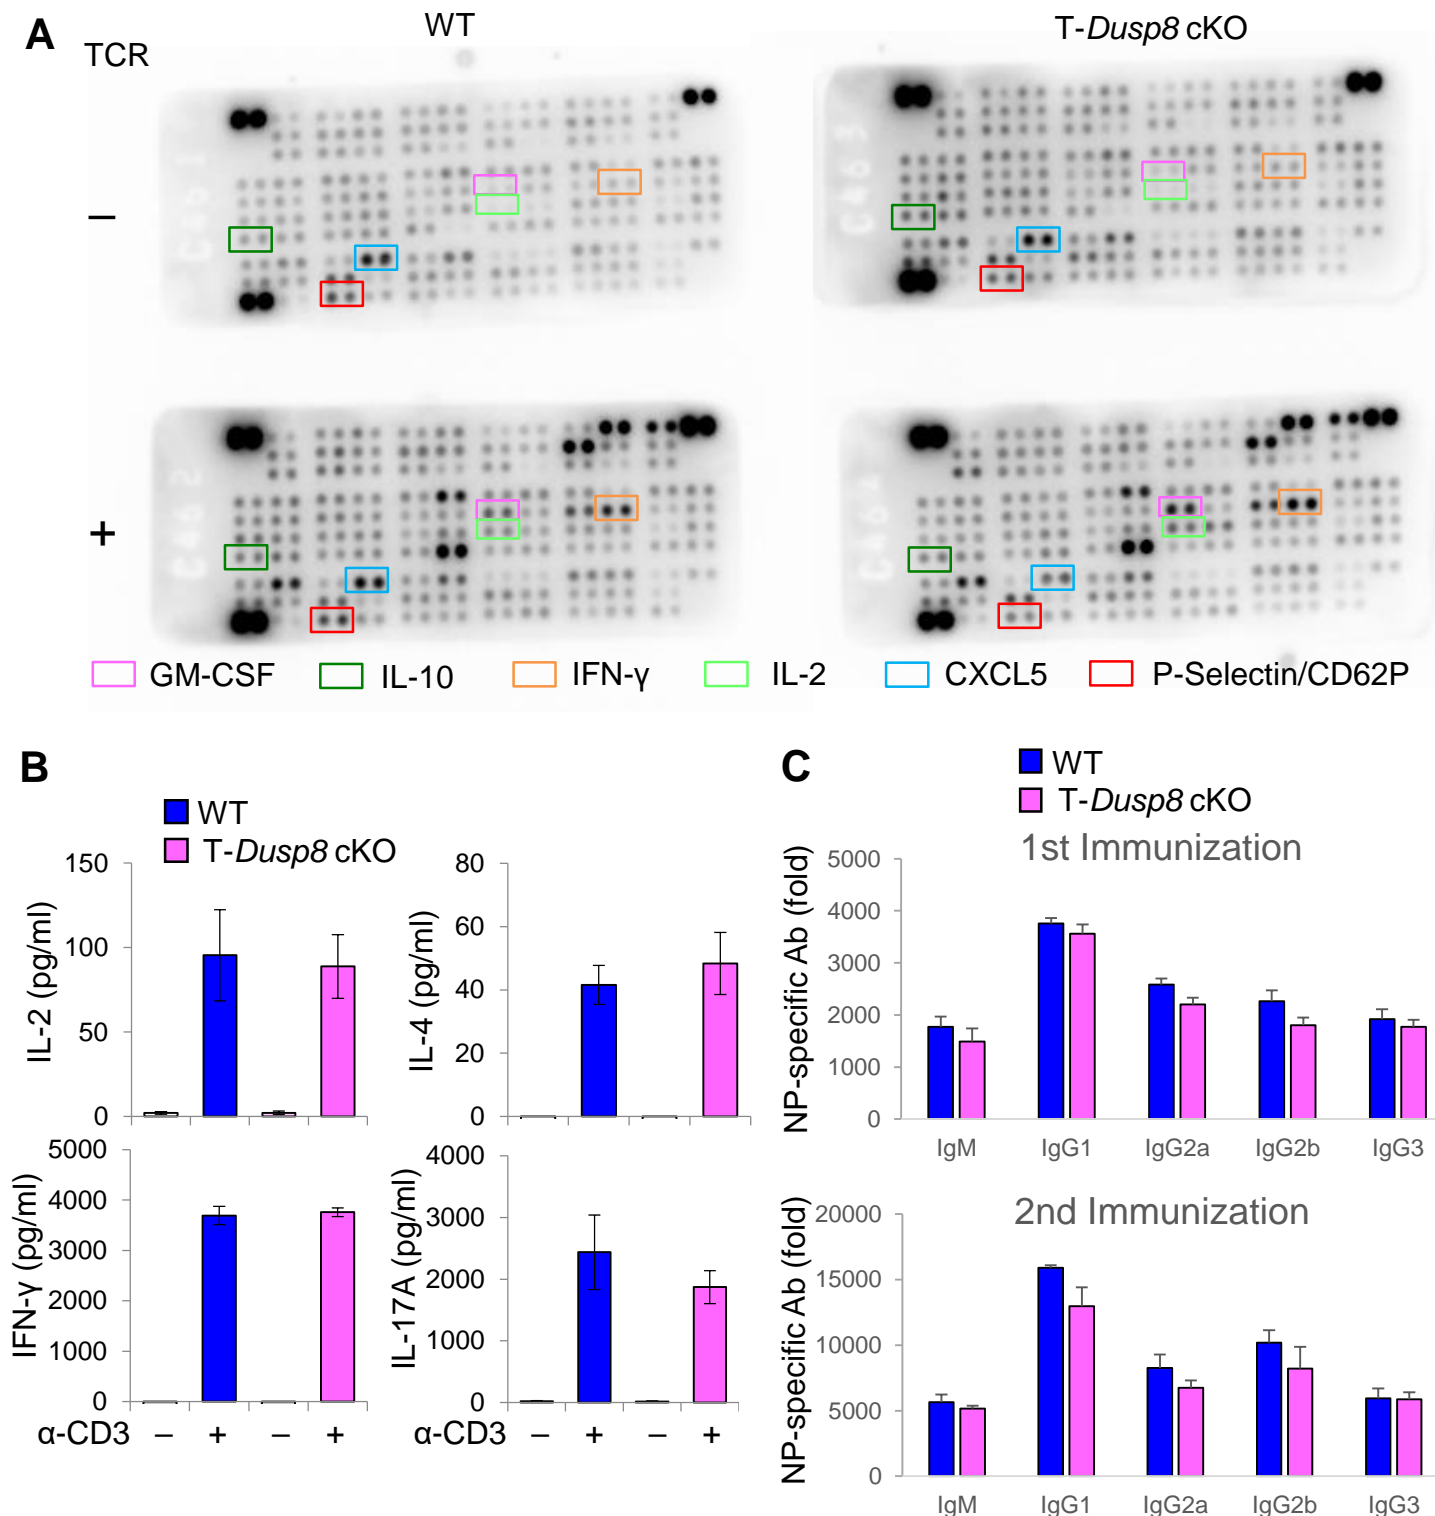

**Supplemental Figure 3. T-cell receptor-stimulated cytokine levels of T-*Dusp8* cKO T cells are comparable to those of wild-type T cells.** (A) Cytokine arrays of 111 cytokines shows individual cytokine levels in the supernatants of T cells from T-*Dusp8* cKO or wild-type mice. T cells were stimulated with anti-CD3 antibody for 72 h. Color frames denote cytokines that are slightly dysregulated in T-*Dusp8* cKO T cells compared to those of wild-type T cells. T-*Dusp8* cKO, *Dusp8*<sup>f/f</sup>; *Cd4-Cre* mice; WT, *Dusp8*<sup>f/f</sup> mice; TCR, T-cell receptor signaling. (B) ELISA of IL-2, IL-4, IL-17A, and IFN- $\gamma$  levels in the supernatants of anti-CD3-stimulated T cells from T-*Dusp8* cKO and wild-type mice.  $n = 6$  (biological replicates). Means  $\pm$  SEM are shown. (C) ELISA of serum nitrophenol-specific antibody (NP-specific Ab) of T-*Dusp8* cKO and wild-type mice. The sera were collected from immunized mice 14 days after primary immunization (upper panel) or 7 days after secondary immunization (lower panel). Means  $\pm$  SD are shown. WT,  $n = 5$ ; T-*Dusp8* cKO,  $n = 3$  (biological replicates). Data are presented relative to those of normal serum from a wild-type mouse.

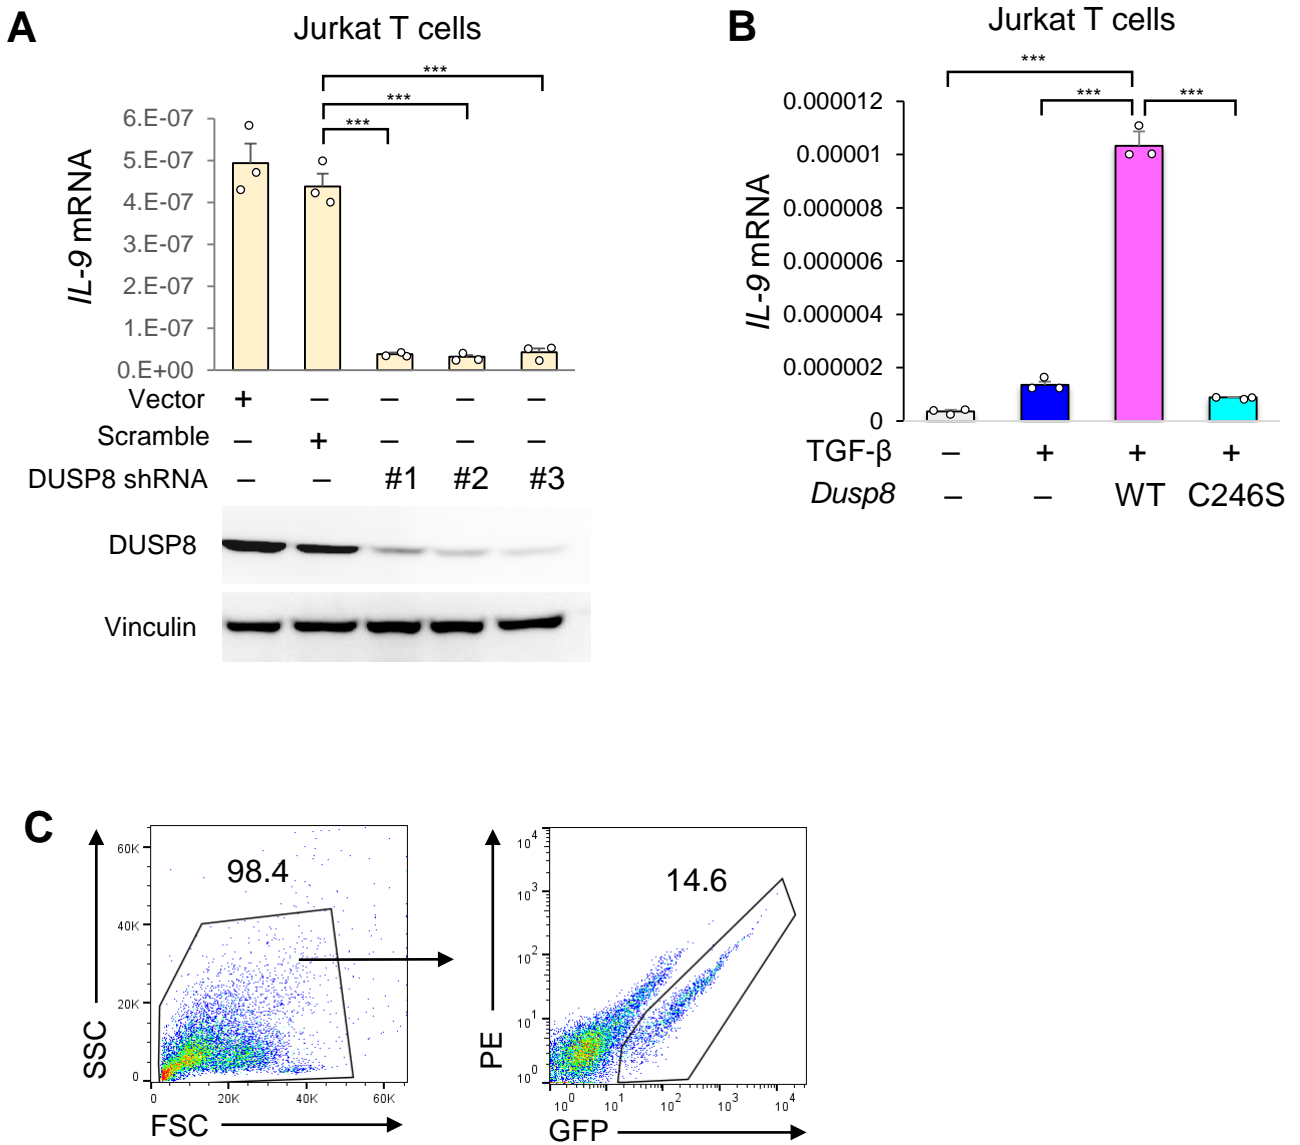

**Supplemental Figure 4. DUSP8 positively regulates *IL-9* mRNA levels in Jurkat T cells stimulated with TGF-β.** (A and B) Real-time PCR of *IL-9* mRNA levels in DUSP8 shRNA knocked-down Jurkat T cells (A) or DUSP8-overexpressing Jurkat T cells (B). Cells were stimulated with TGF-β (50 ng/ml) for 8 h. The expression levels of *IL-9* were normalized to *GAPDH* levels. Means ± SEM are shown. n = 3. DUSP8 protein levels in DUSP8 shRNA knocked-down Jurkat T cells were determined by immunoblotting analysis (A, lower panel). WT, wild-type; C246S, phosphatase-dead mutant. (C) Gating strategy for the transfected (GFP-positive) human primary Th9 cells by Influx cell sorter. \*\*\*, *P* value < 0.001 (one-way ANOVA and Tukey's post hoc test).

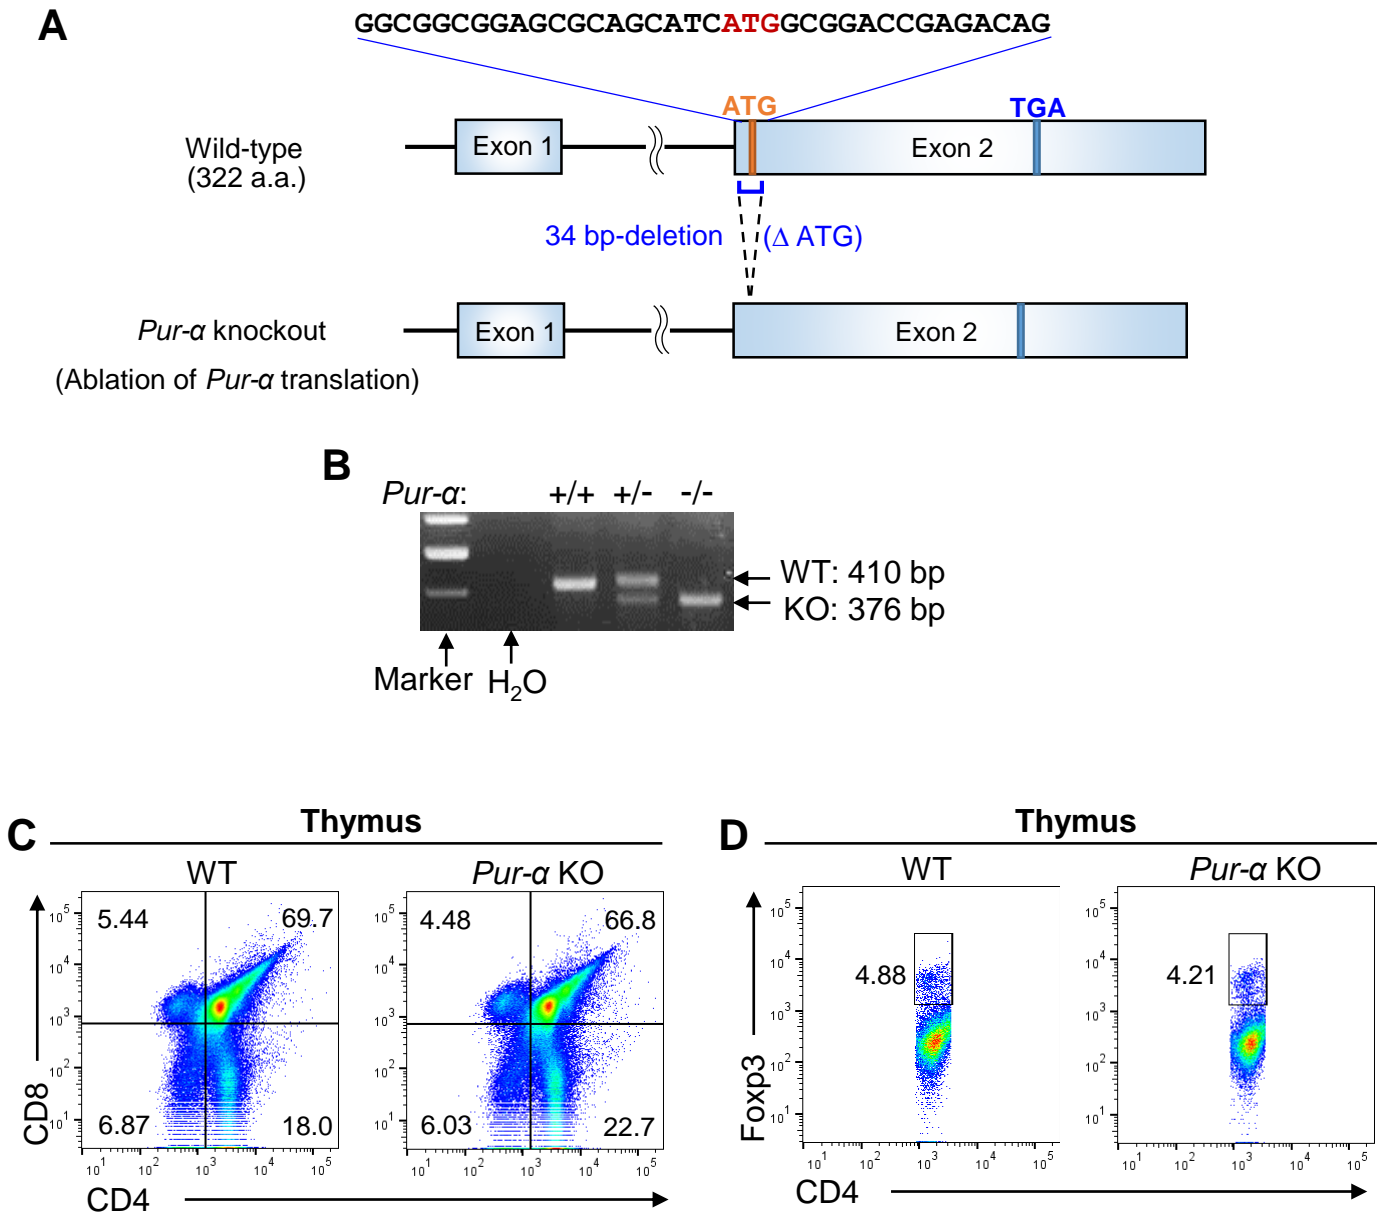

**Supplemental Figure 5. *Pur- $\alpha$*  KO mice display normal T-cell development.** (A) Schematic diagram of the murine *Pur- $\alpha$*  wild-type allele and the targeted *Pur- $\alpha$*  mutant allele. *Pur- $\alpha$*  knockout mice were generated by CRISPR/Cas9-mediated gene targeting. The deletion of 34 bp including the start codon (ATG) on exon 2 resulted in the obliterating of *Pur- $\alpha$*  translation. (B) The PCR product of the 410-bp band indicates the wild-type (WT) *Pur- $\alpha$*  allele; the 376-bp band indicates the *Pur- $\alpha$*  knockout allele. (C and D) Flow cytometry analyses of T cells (C) and Treg cells (D) from the thymus of 21-day-old *Pur- $\alpha$*  knockout or wild-type mice. WT, wild-type mice; KO, *Pur- $\alpha$*  knockout mice.

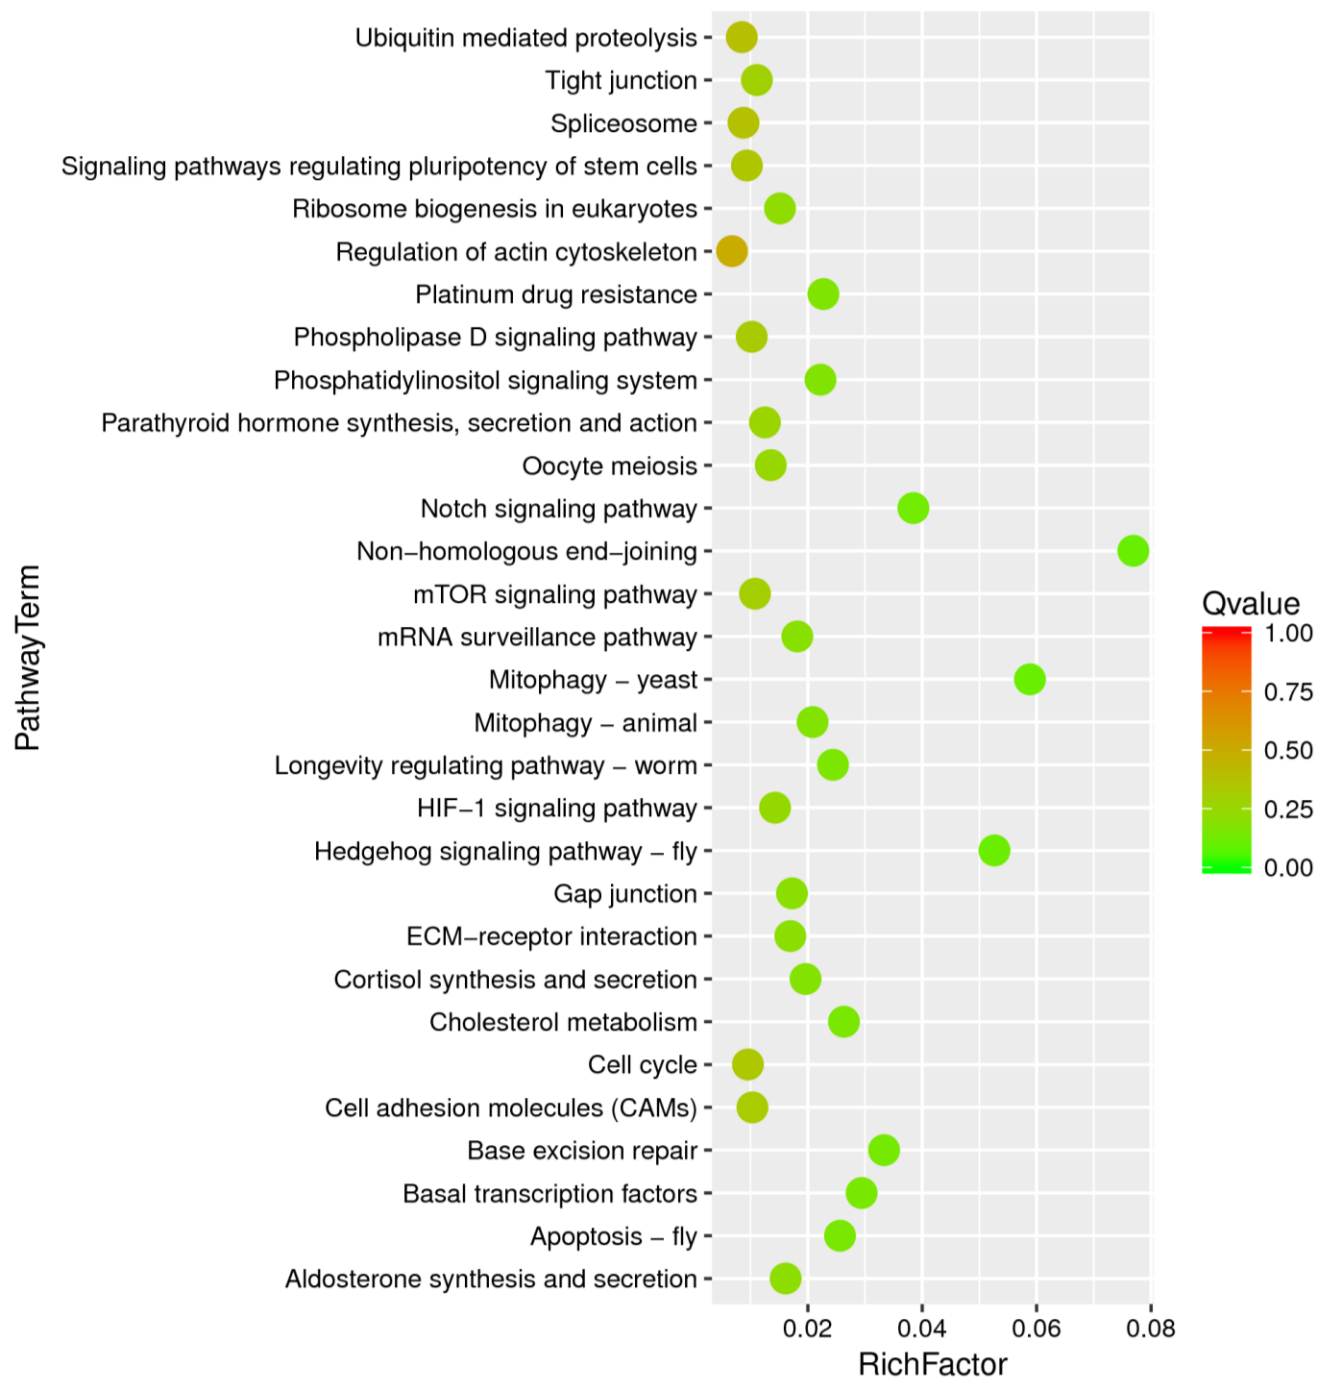

**Supplemental Figure 6. Pur- $\alpha$  may regulate multiple genes of diverse pathways in T-*Dusp8* cKO T cells.** Kyoto Encyclopedia of Genes and Genomes (KEGG) enrichment analysis shows the pathways of multiple peak-associated genes identified by Pur- $\alpha$ -ChIP sequencing using T-*Dusp8* cKO T cells compared to those of wild-type (*DUSP8<sup>f/f</sup>*) T cells.

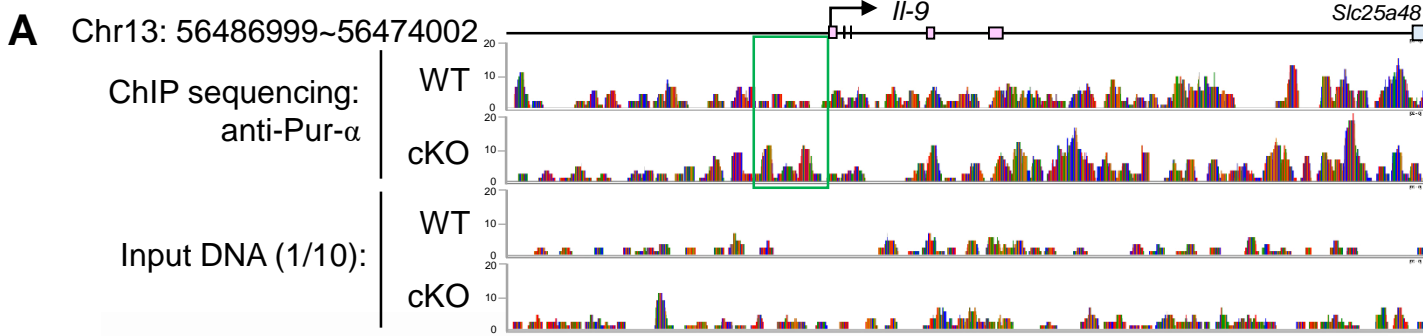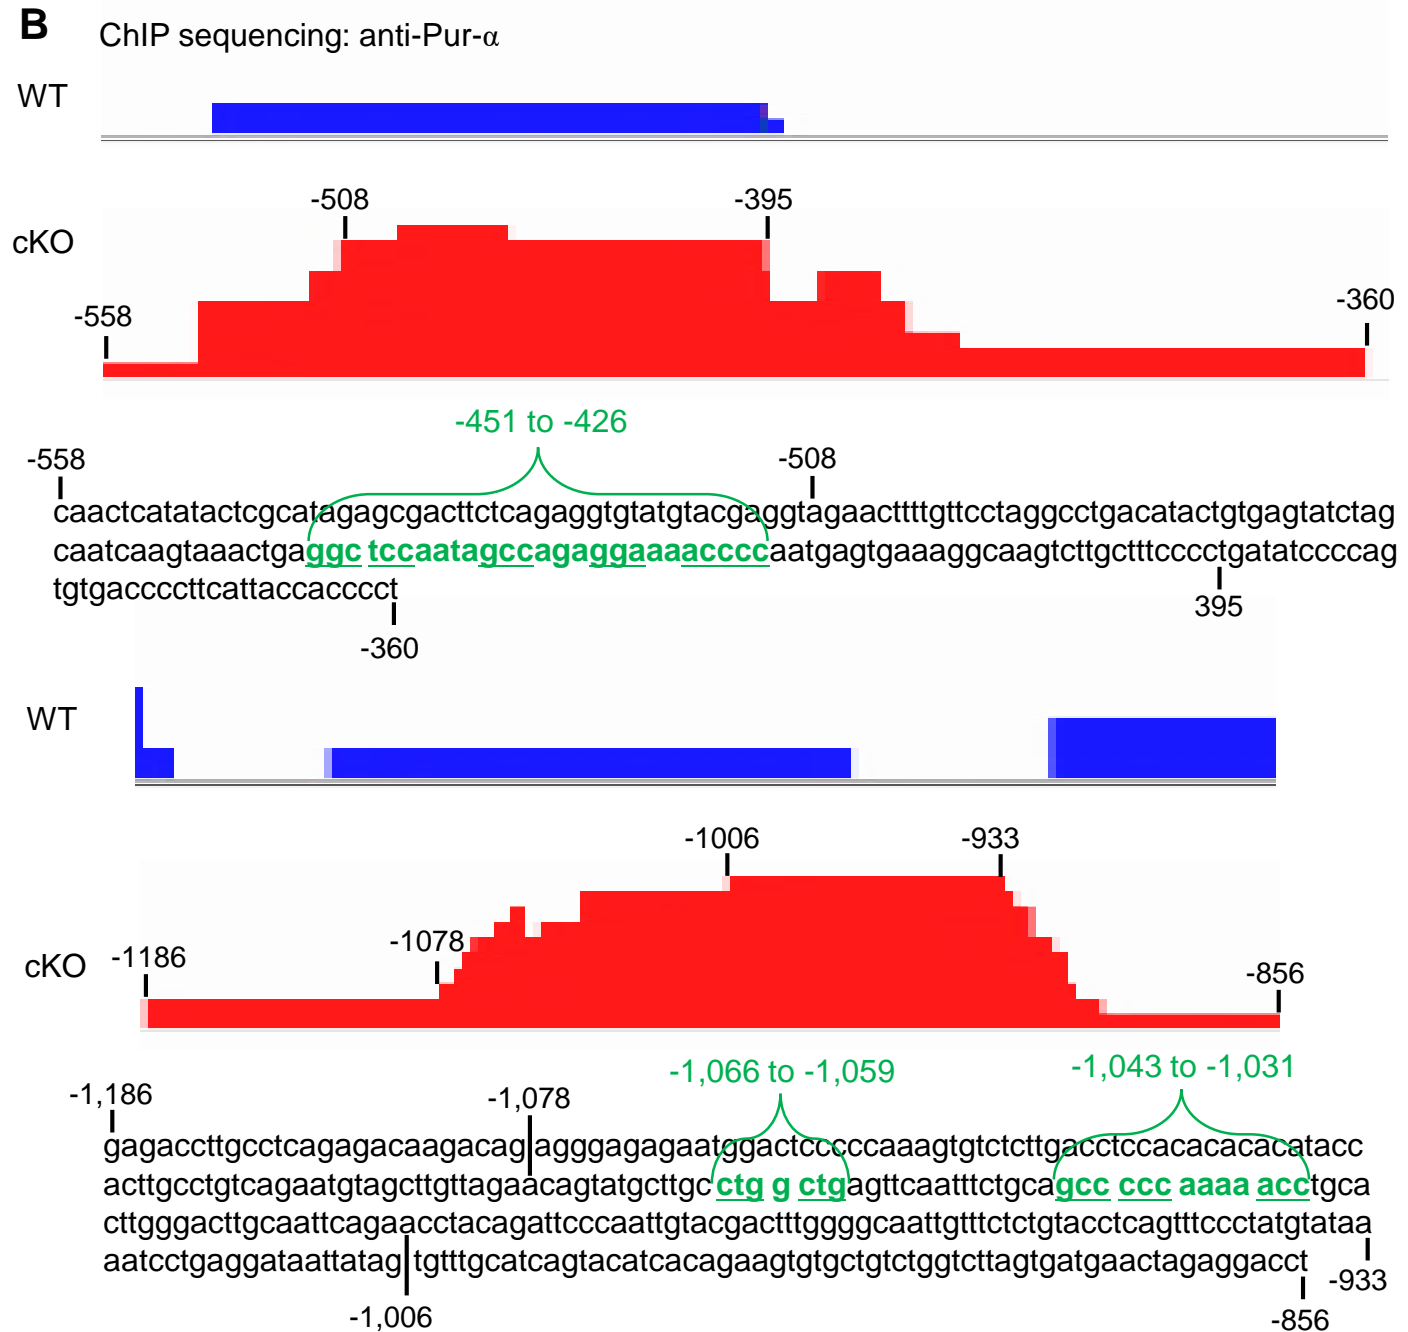

**Supplemental Figure 7. Sequences of enhanced Pur- $\alpha$ -binding regions in the mouse *Il-9* promoter.**

(A) The binding of Pur- $\alpha$  to the IL-9 gene locus in TGF- $\beta$ -stimulated T cells from T-*Dusp8* cKO or wild-type mice was analyzed by chromatin-immunoprecipitation (ChIP) sequencing using anti-Pur- $\alpha$  antibody. The peaks showed the Pur- $\alpha$ -binding regions (GRCm38.p6 murine reference genome Chr13: 56486999~56474002). (B) Characters shown in green denote the three putative Pur- $\alpha$ -binding elements (-451 to -426, -1,043 to -1,031, and -1,066 to -1,059) coinciding with the two regions that showed the most enhanced Pur- $\alpha$  bindings to the *Il-9* promoter in T-*Dusp8* cKO T cells. Characters with a underline denote the putative Pur- $\alpha$ -binding repeats, (GGN) $n$  or (CAG) $n$  motif, as well as its complementary sequence (NCC) $n$  or (CTG) $n$ . N denotes any nucleotide.

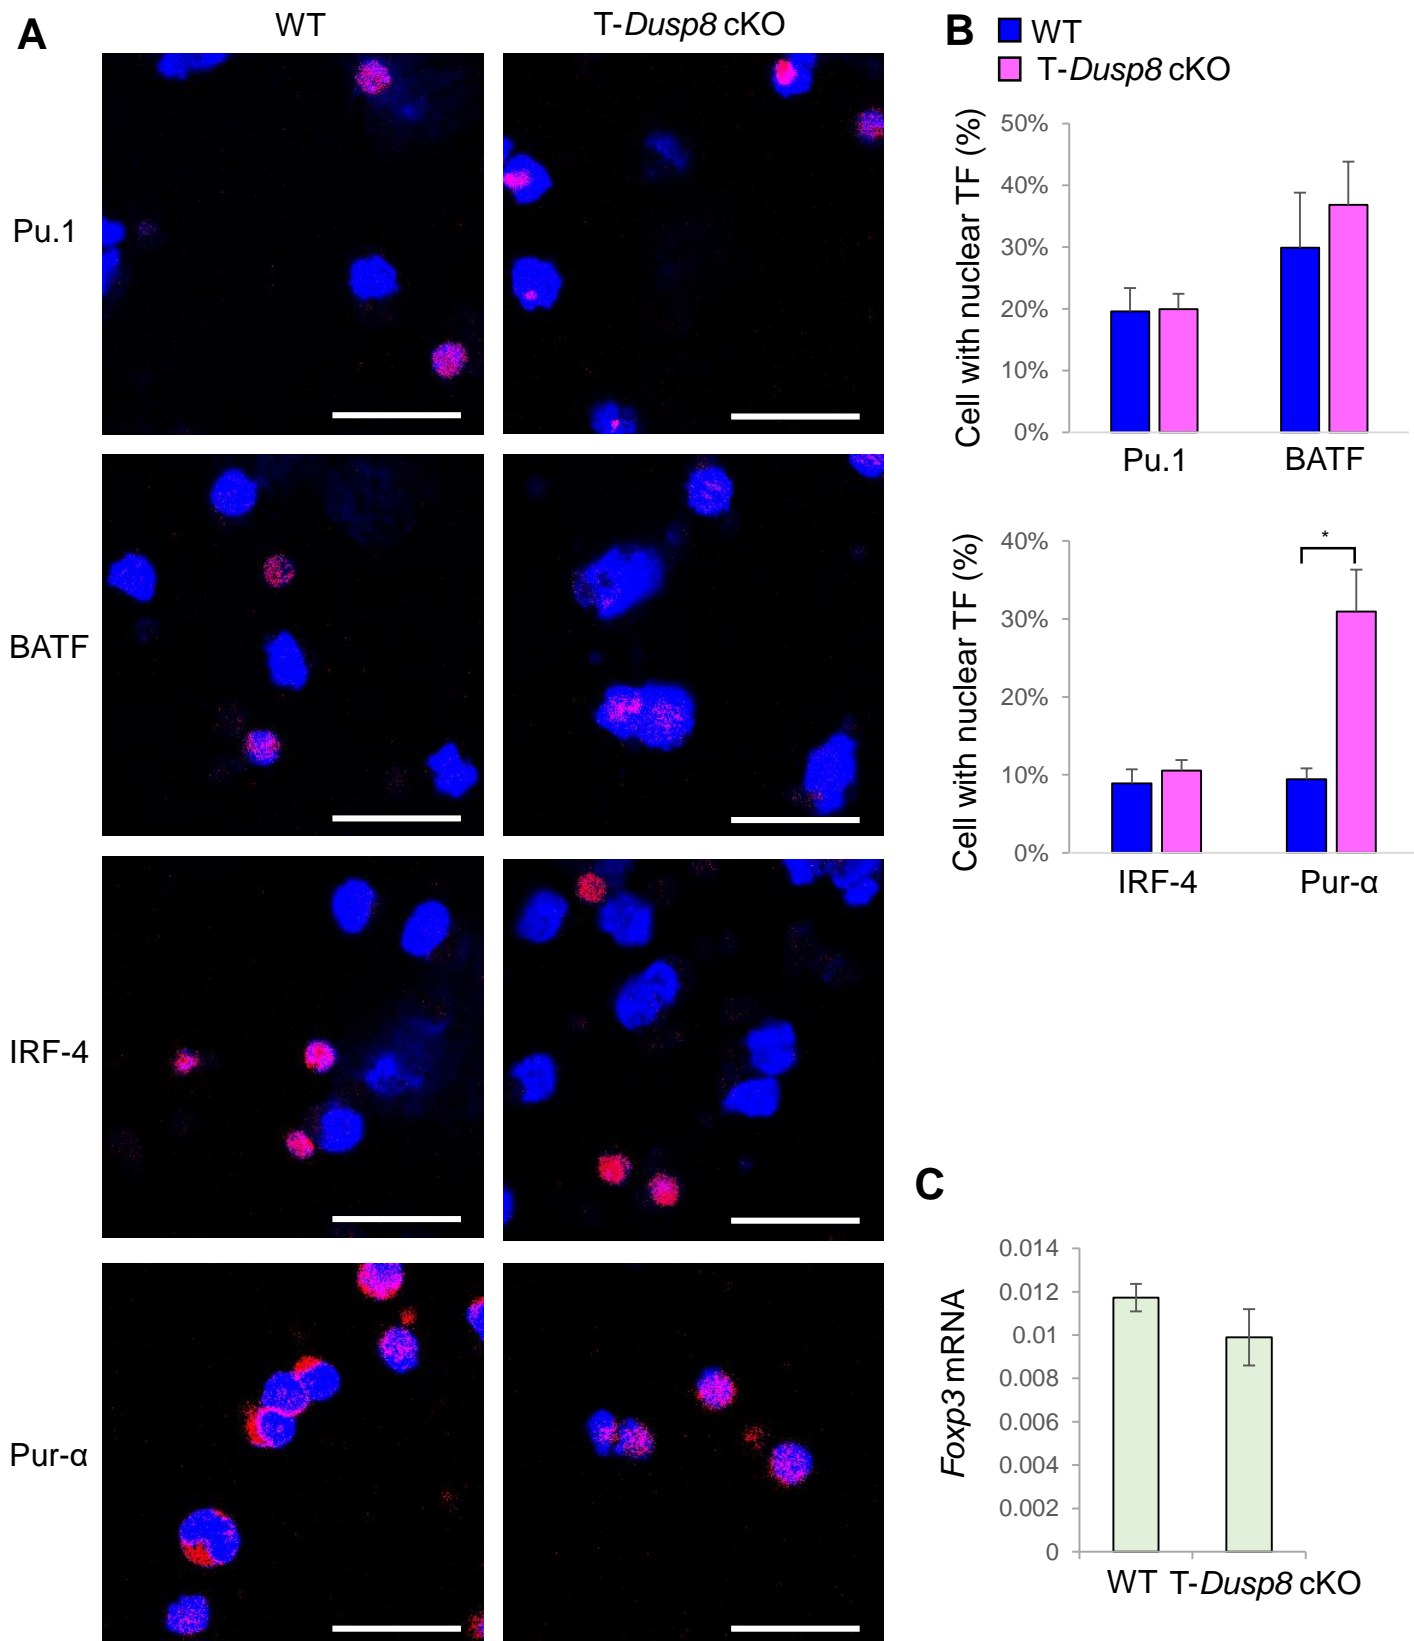

**Supplemental Figure 8. DUSP8 regulates Th9 differentiation in a PU.1/BATF/IRF-4/Foxp3-independent manner.** (A) Confocal microscopy analyses of PU.1, BATF, IRF-4, or Pur- $\alpha$  in the *in vitro* differentiated Th9 cells of wild-type or T-*Dusp8* cKO mice. Cell nuclei were stained with DAPI. Scale bars, 25  $\mu$ m. (B) The percentages of T cells containing the nuclear PU.1, BATF, IRF-4, or Pur- $\alpha$  were shown as mean  $\pm$  SEM from 5 images. TF, transcription factor. (C) Real-time PCR analyses of *Foxp3* mRNA levels in the *in vitro* differentiated Th9 cells of wild-type or T-*Dusp8* cKO mice. *Foxp3* mRNA levels were normalized to *Srp72* levels. n = 2 (technical replicates). Means  $\pm$  SD are shown. \*,  $P$  value < 0.05 (two-tailed Student's t-test)



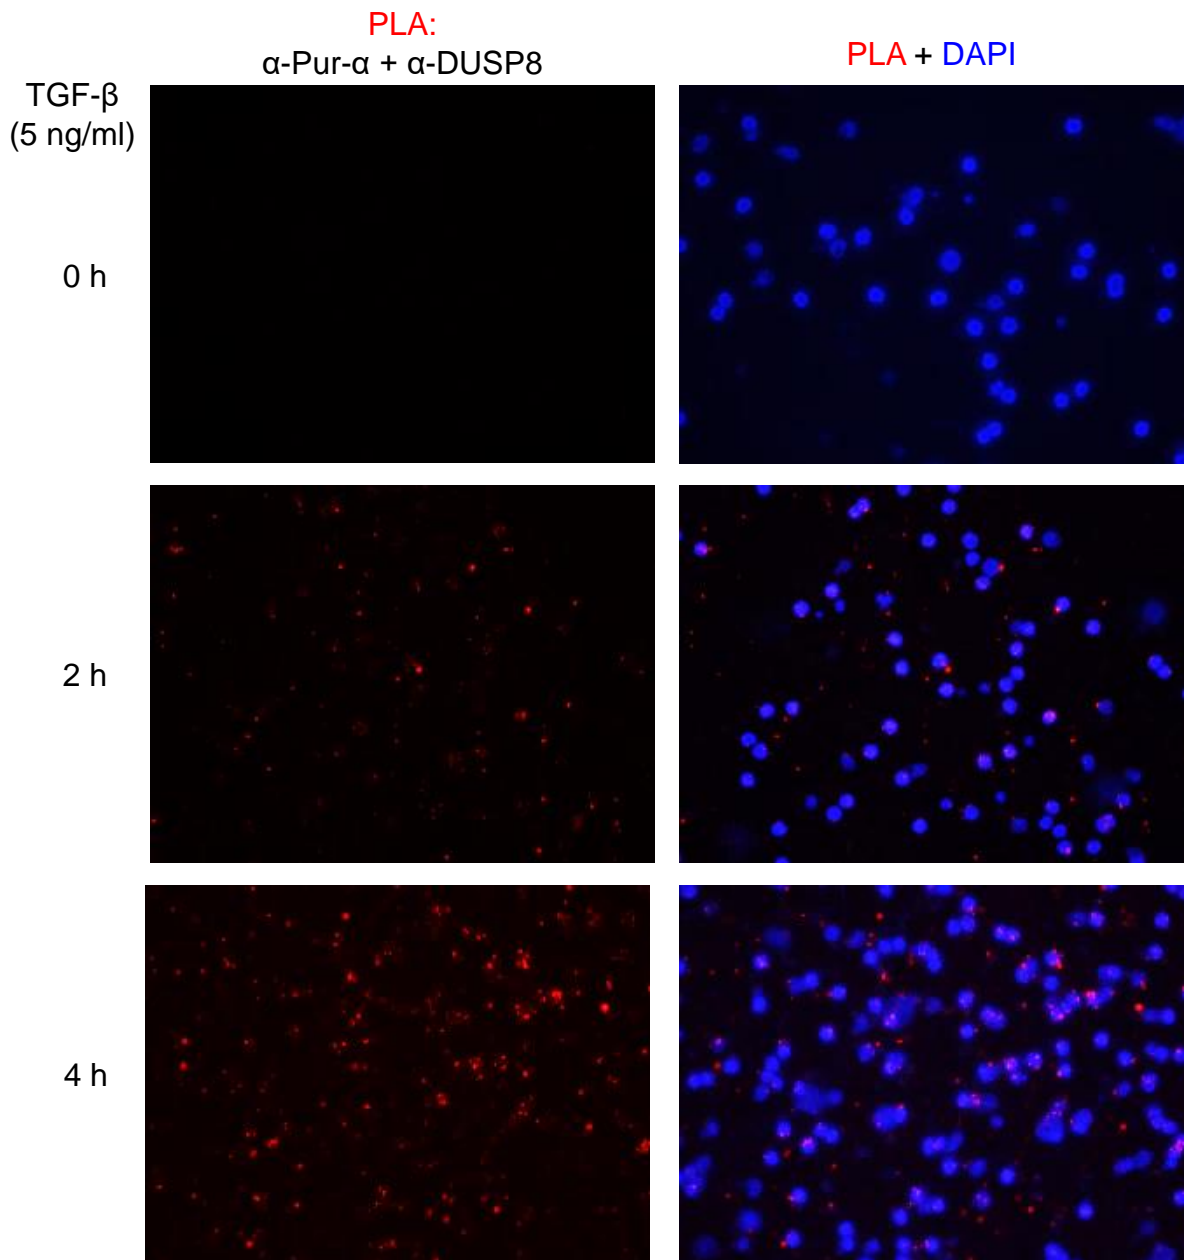

**Supplemental Figure 9. Pur- $\alpha$  directly interacts with DUSP8 in T cells stimulated with TGF- $\beta$ .**

In situ proximity ligation assays (PLA) of close proximity (< 40 nm) between Pur- $\alpha$  and DUSP8 in murine primary T cells stimulated with TGF- $\beta$  (5 ng/ml) for 6 h. For PLA, red dots represent direct interaction signals. Cell nuclei were stained with DAPI. Original magnification, x630.

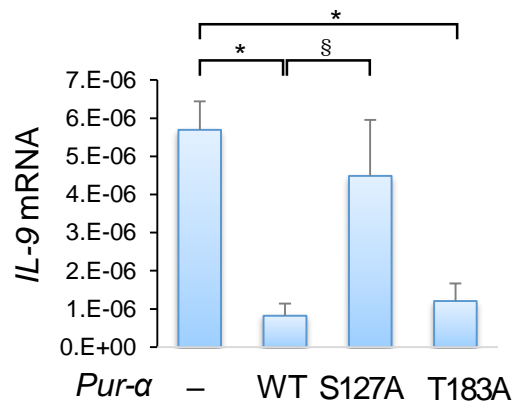

**Supplemental Figure 10. Pur- $\alpha$  overexpression inhibits *IL-9* mRNA levels in Jurkat T cells stimulated with TGF- $\beta$ .** Real-time PCR of *IL-9* mRNA levels in Jurkat T cells transfected with *Pur- $\alpha$*  wild-type or phospho-deficient mutant (S127A or T183A) plasmid. Jurkat cells were stimulated with TGF- $\beta$  (50 ng/ml) for 8 h. The expression levels of *IL-9* mRNAs were normalized to *GAPDH* levels. \*, *P* value < 0.05 (one-way ANOVA and Tukey's post hoc test); §, *P* value < 0.05 (one-way ANOVA and least significance difference test).

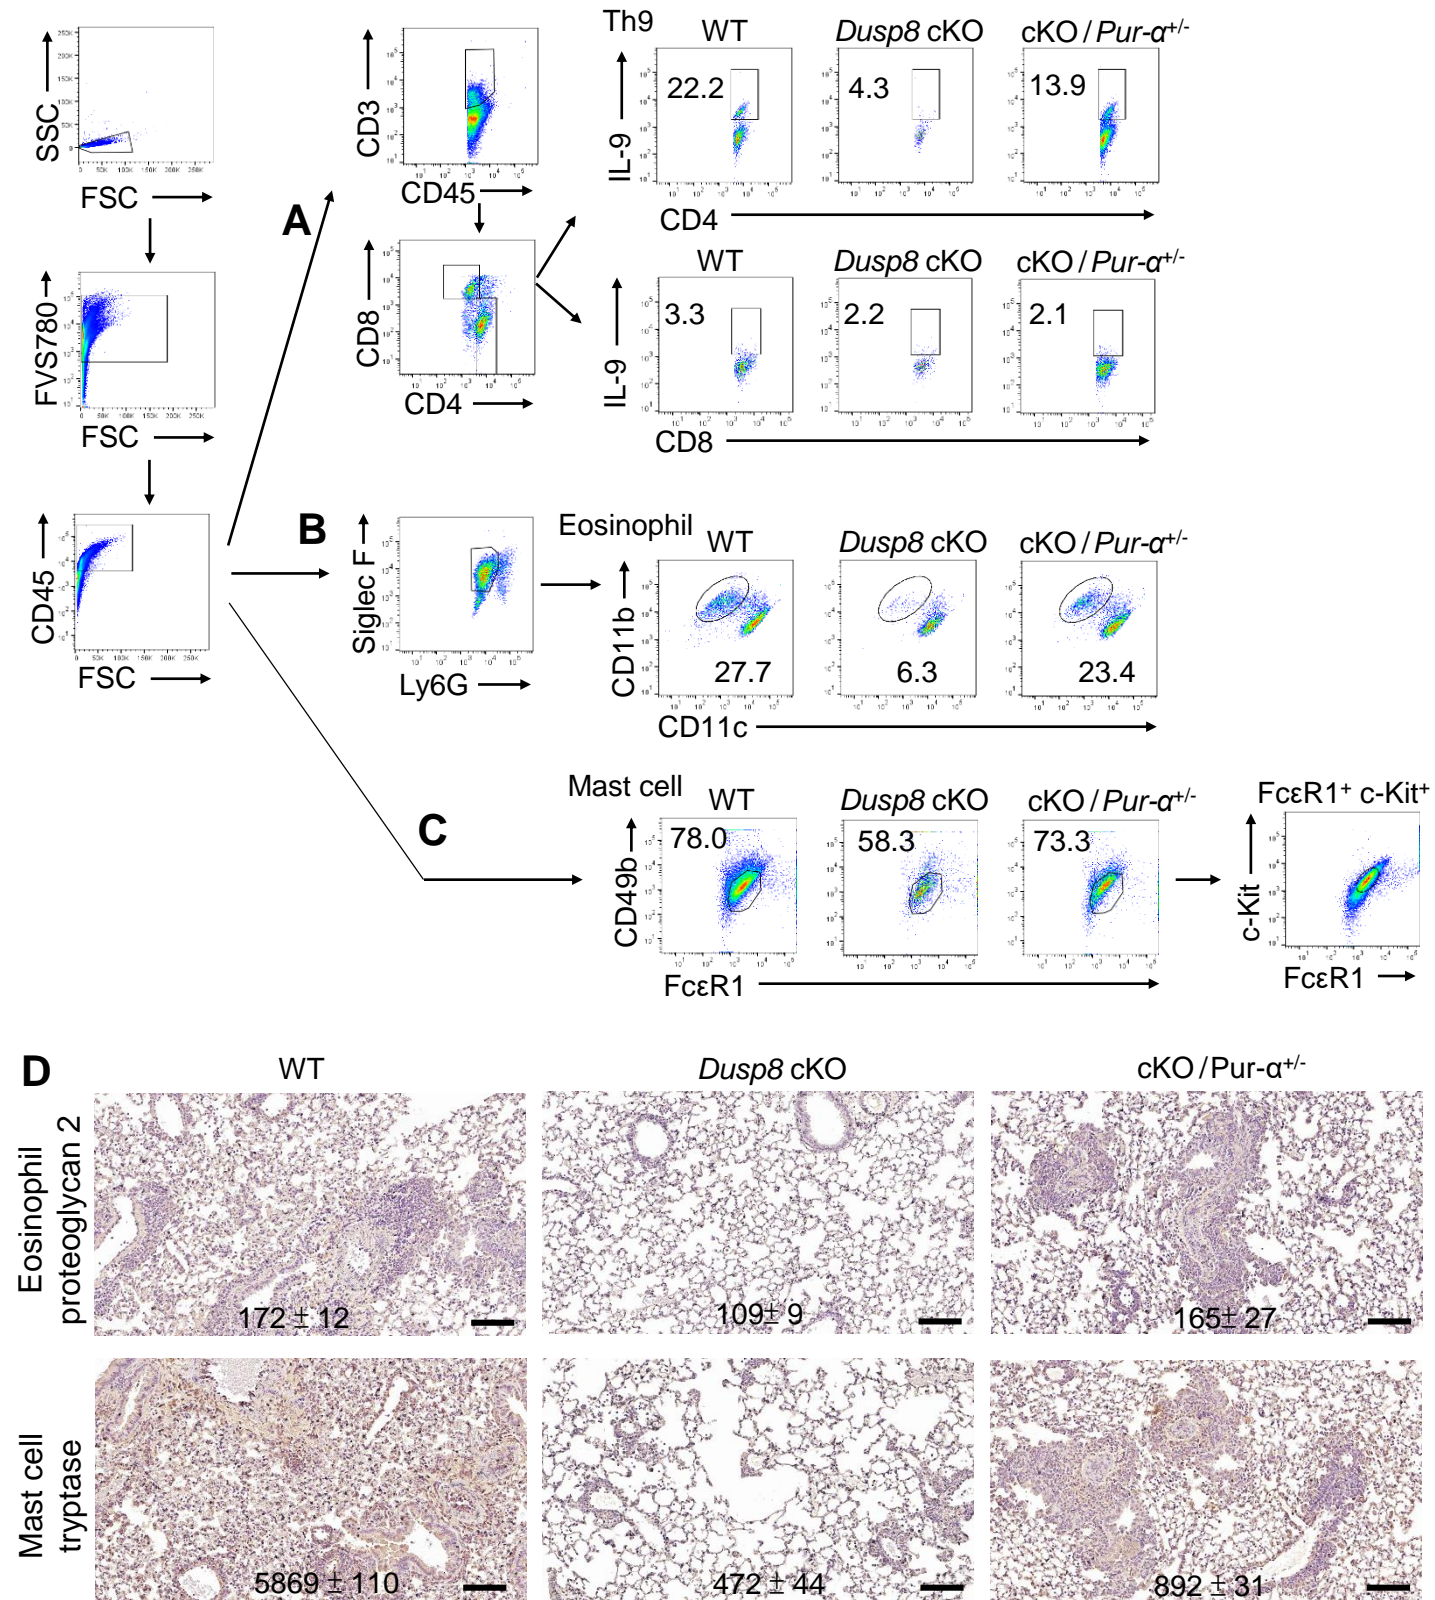

**Supplemental Figure 11. Lung infiltrating immune cells of OVA-induced allergic asthma are decreased in T-cell-specific *Dusp8* conditional knockout mice.** (A to C) Flow cytometry analyses of Th9 cells (CD45<sup>+</sup>, CD3<sup>+</sup>, CD4<sup>+</sup>, IL-9<sup>+</sup>), IL-9-producing CD8<sup>+</sup> T cells (CD45<sup>+</sup>, CD3<sup>+</sup>, CD8<sup>+</sup>, IL-9<sup>+</sup>) (A), eosinophils (CD45<sup>+</sup>, Ly6G<sup>-</sup>, CD11b<sup>+</sup>, CD11c<sup>-</sup>) (B), and mast cells (CD45<sup>+</sup>, CD49b<sup>+</sup>; the infiltrating mast cells are also c-kit<sup>+</sup>, FcεR1<sup>+</sup>) (C) in the lungs from mice on day 26 of the OVA-induced allergic asthma. Infiltrating immune cells were isolated from the lung tissues by Percoll gradient centrifugation. (D) Immunohistochemical staining images of mast cell tryptase (a mast-cell marker) and proteoglycan 2 (also named pro-eosinophil major basic protein, an eosinophil marker) in the lung tissues of OVA-induced allergic asthma mice. Mean ± SEM of infiltrating immune cells from 3 images are shown below individual panels. Scale bars, 100 μm. Data shown are a representative of *Dusp8*<sup>fl/fl</sup> (WT), *Dusp8*<sup>fl/fl</sup>; *Cd4-Cre* (*Dusp8* cKO), and *Dusp8*<sup>fl/fl</sup>; *Cd4-Cre*; *Pur-α*<sup>+/-</sup> (cKO / *Pur-α*<sup>+/-</sup>).

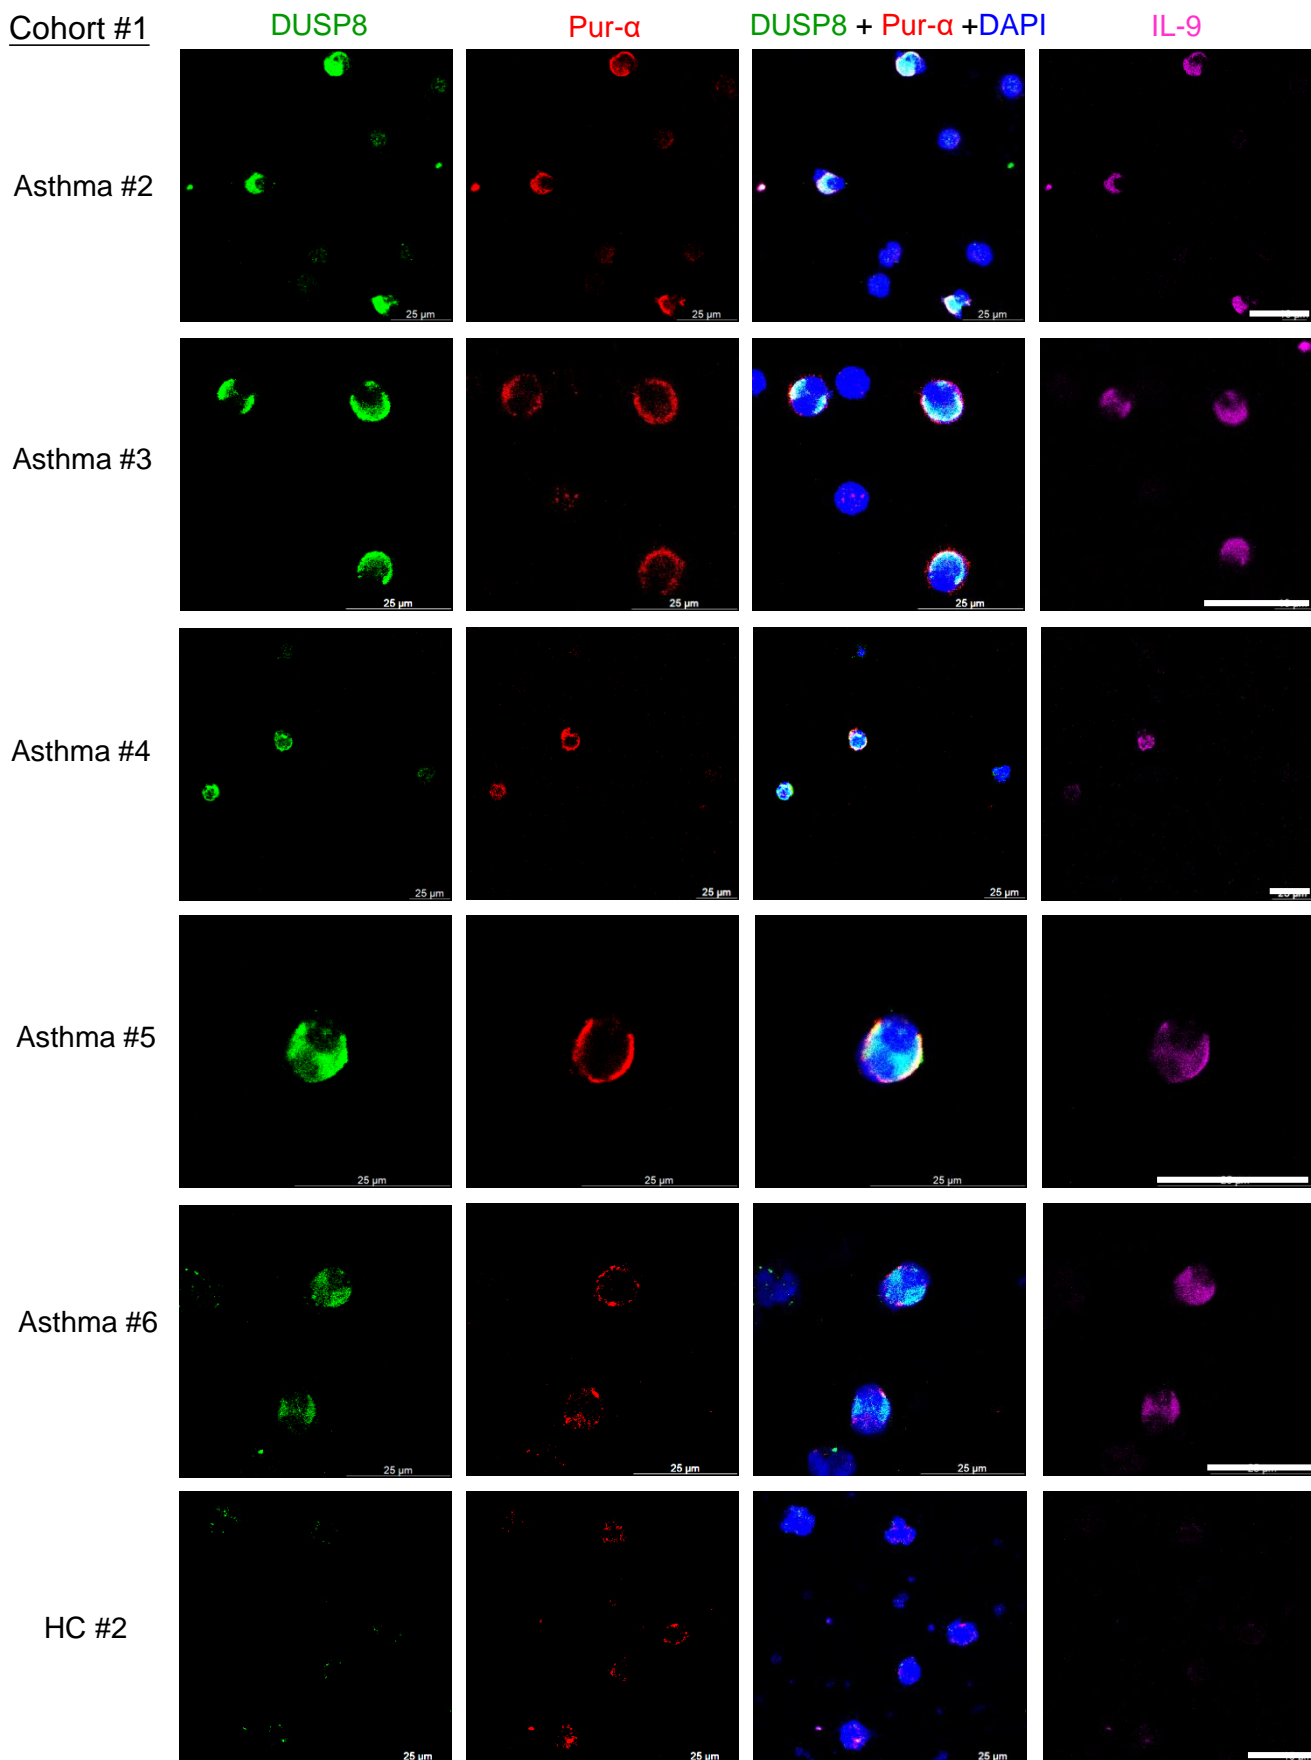

**Supplemental Figure 12. Pur- $\alpha$  mainly localizes to the cytoplasm of the T cells from patients with asthma or atopic dermatitis.** Confocal microscopy analyses of DUSP8 (green), Pur- $\alpha$  (red), DAPI (blue), and IL-9 (purple) in the peripheral blood T cells of 11 representative healthy controls (HC), 22 representative asthma patients, and 7 representative atopic dermatitis (AD) patients from Cohort #1 and Cohort #2. Scale bars, 25  $\mu$ m.

(Continued Supplemental Figure 12)

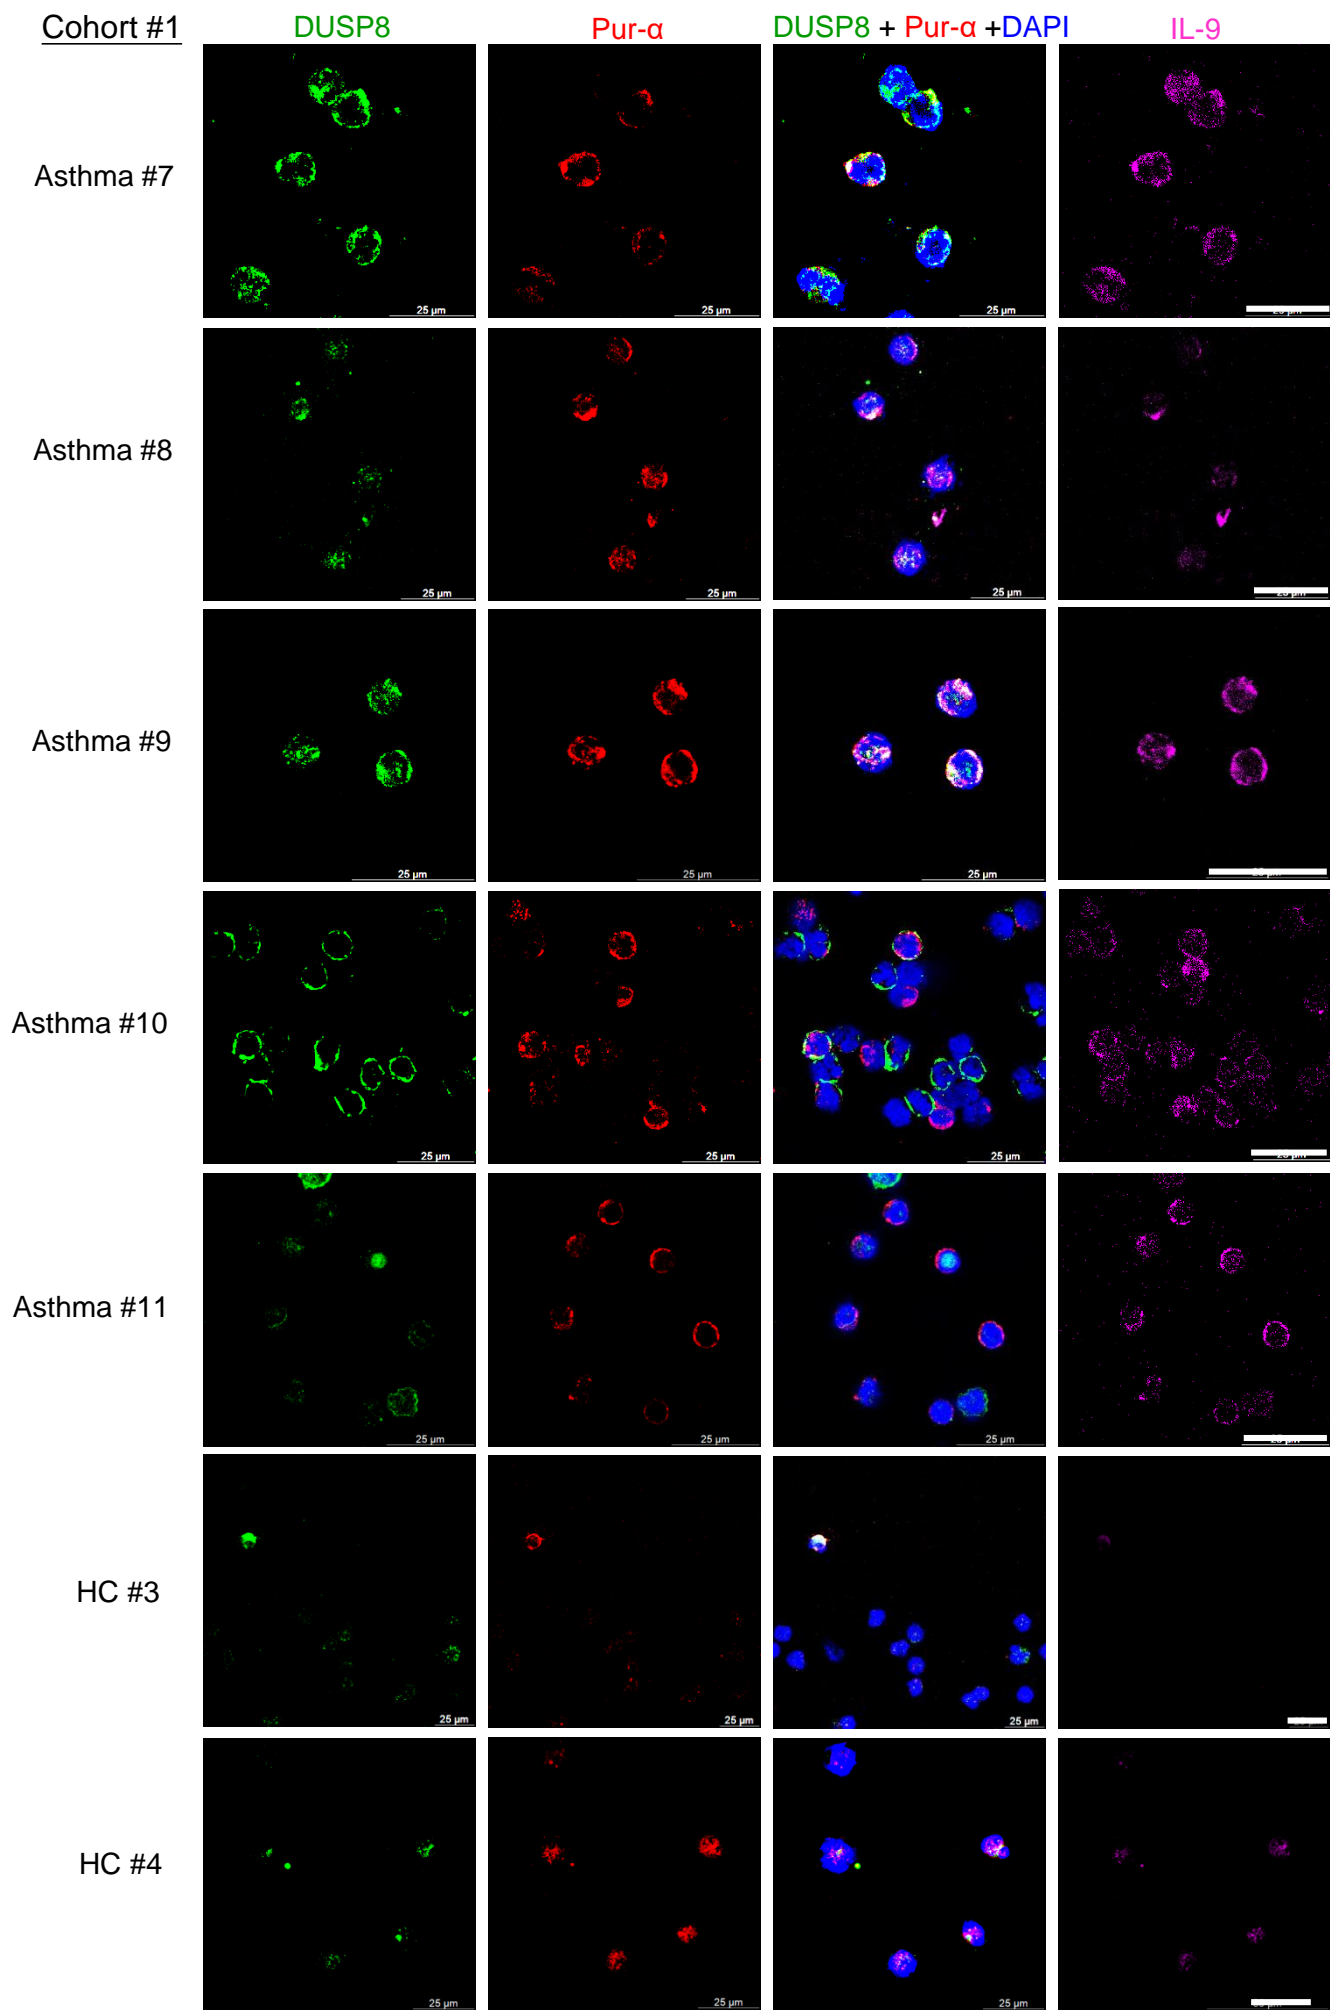

(Continued Supplemental Figure 12)

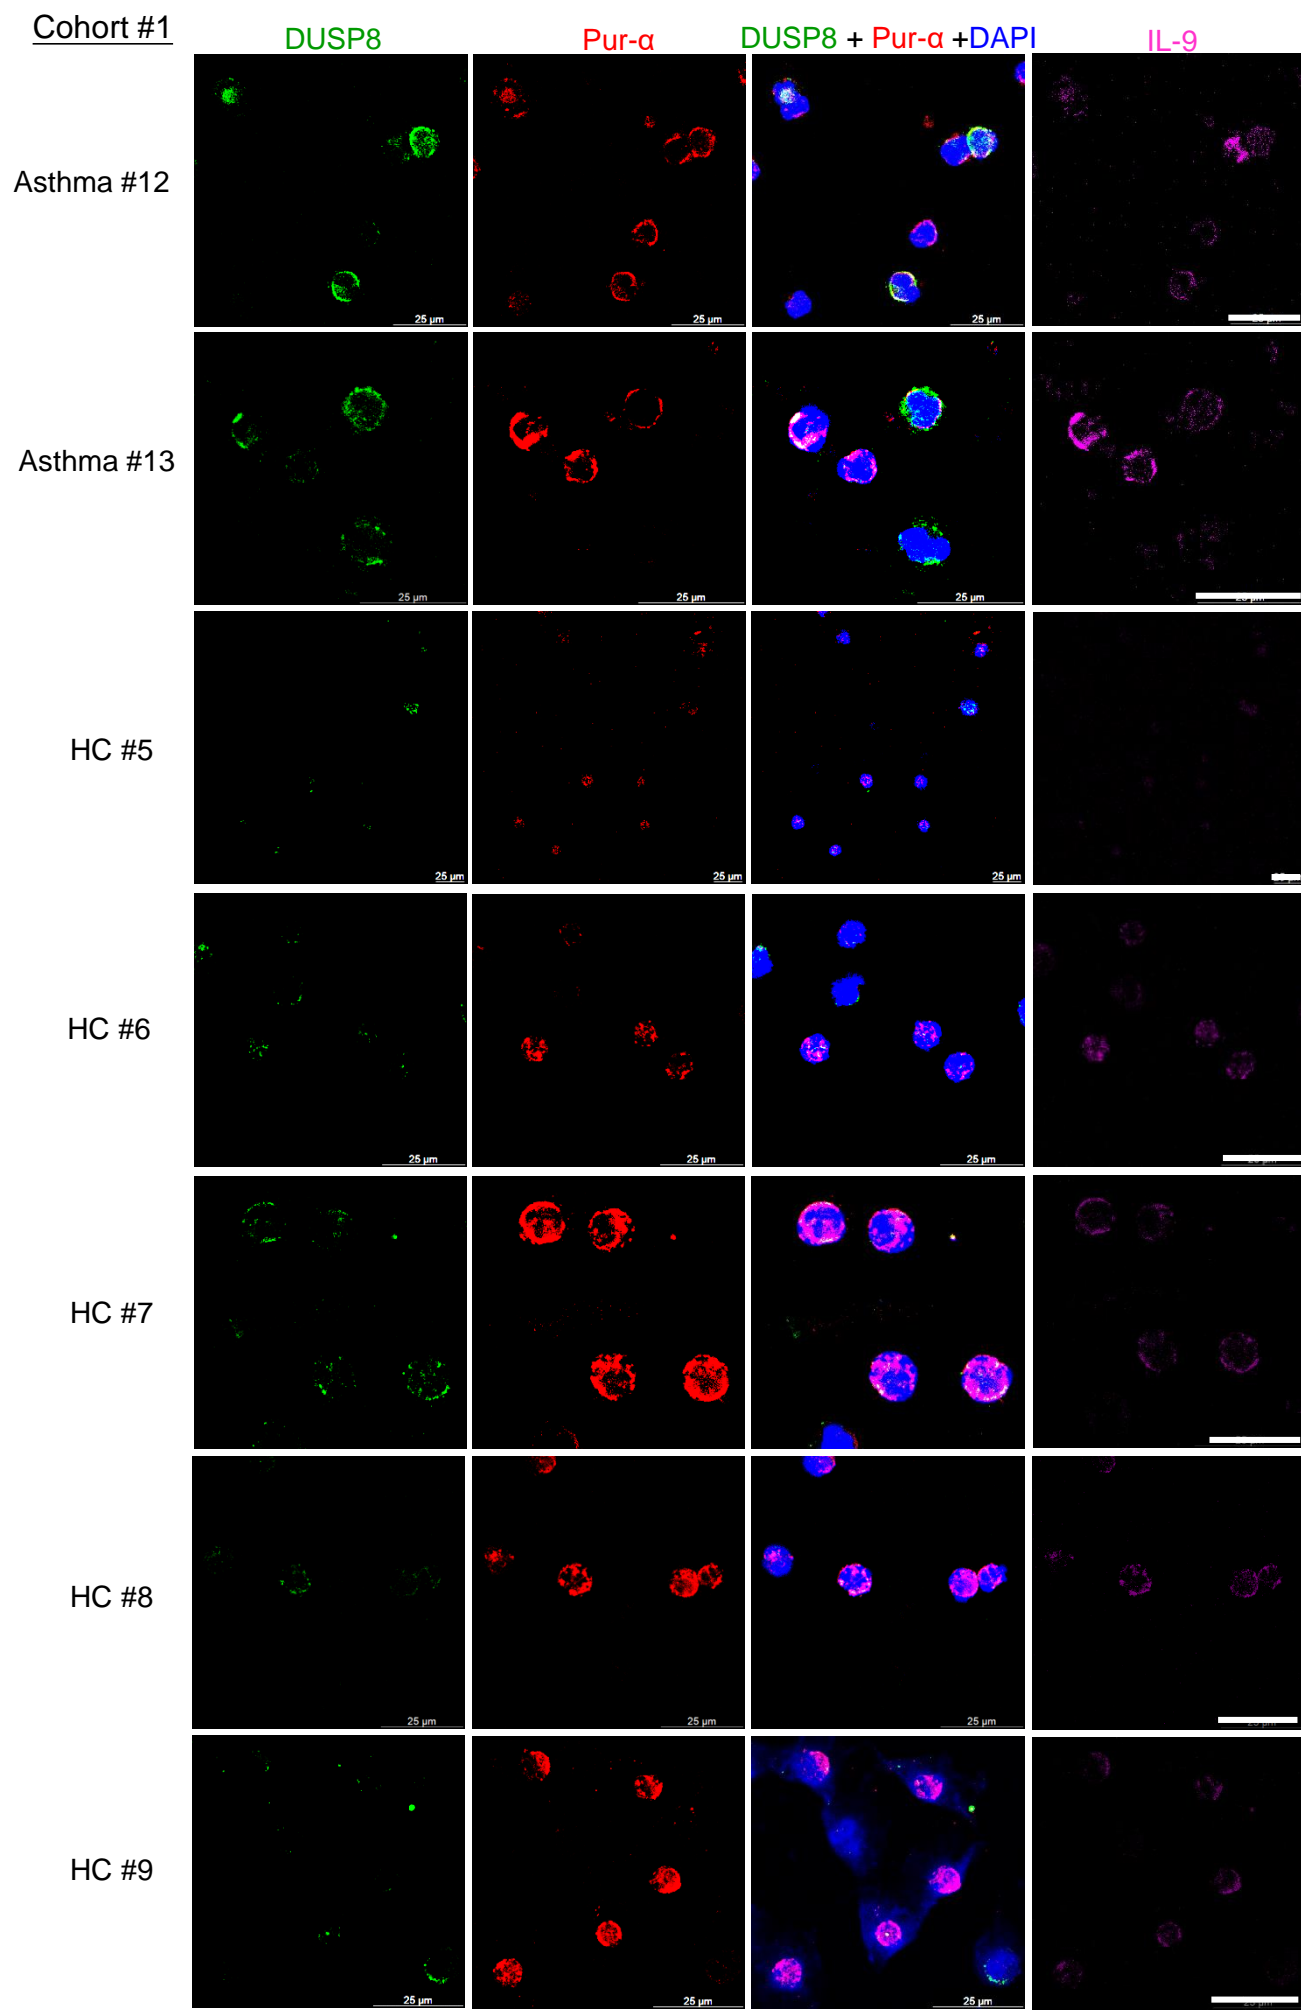

(Continued Supplemental Figure 12)

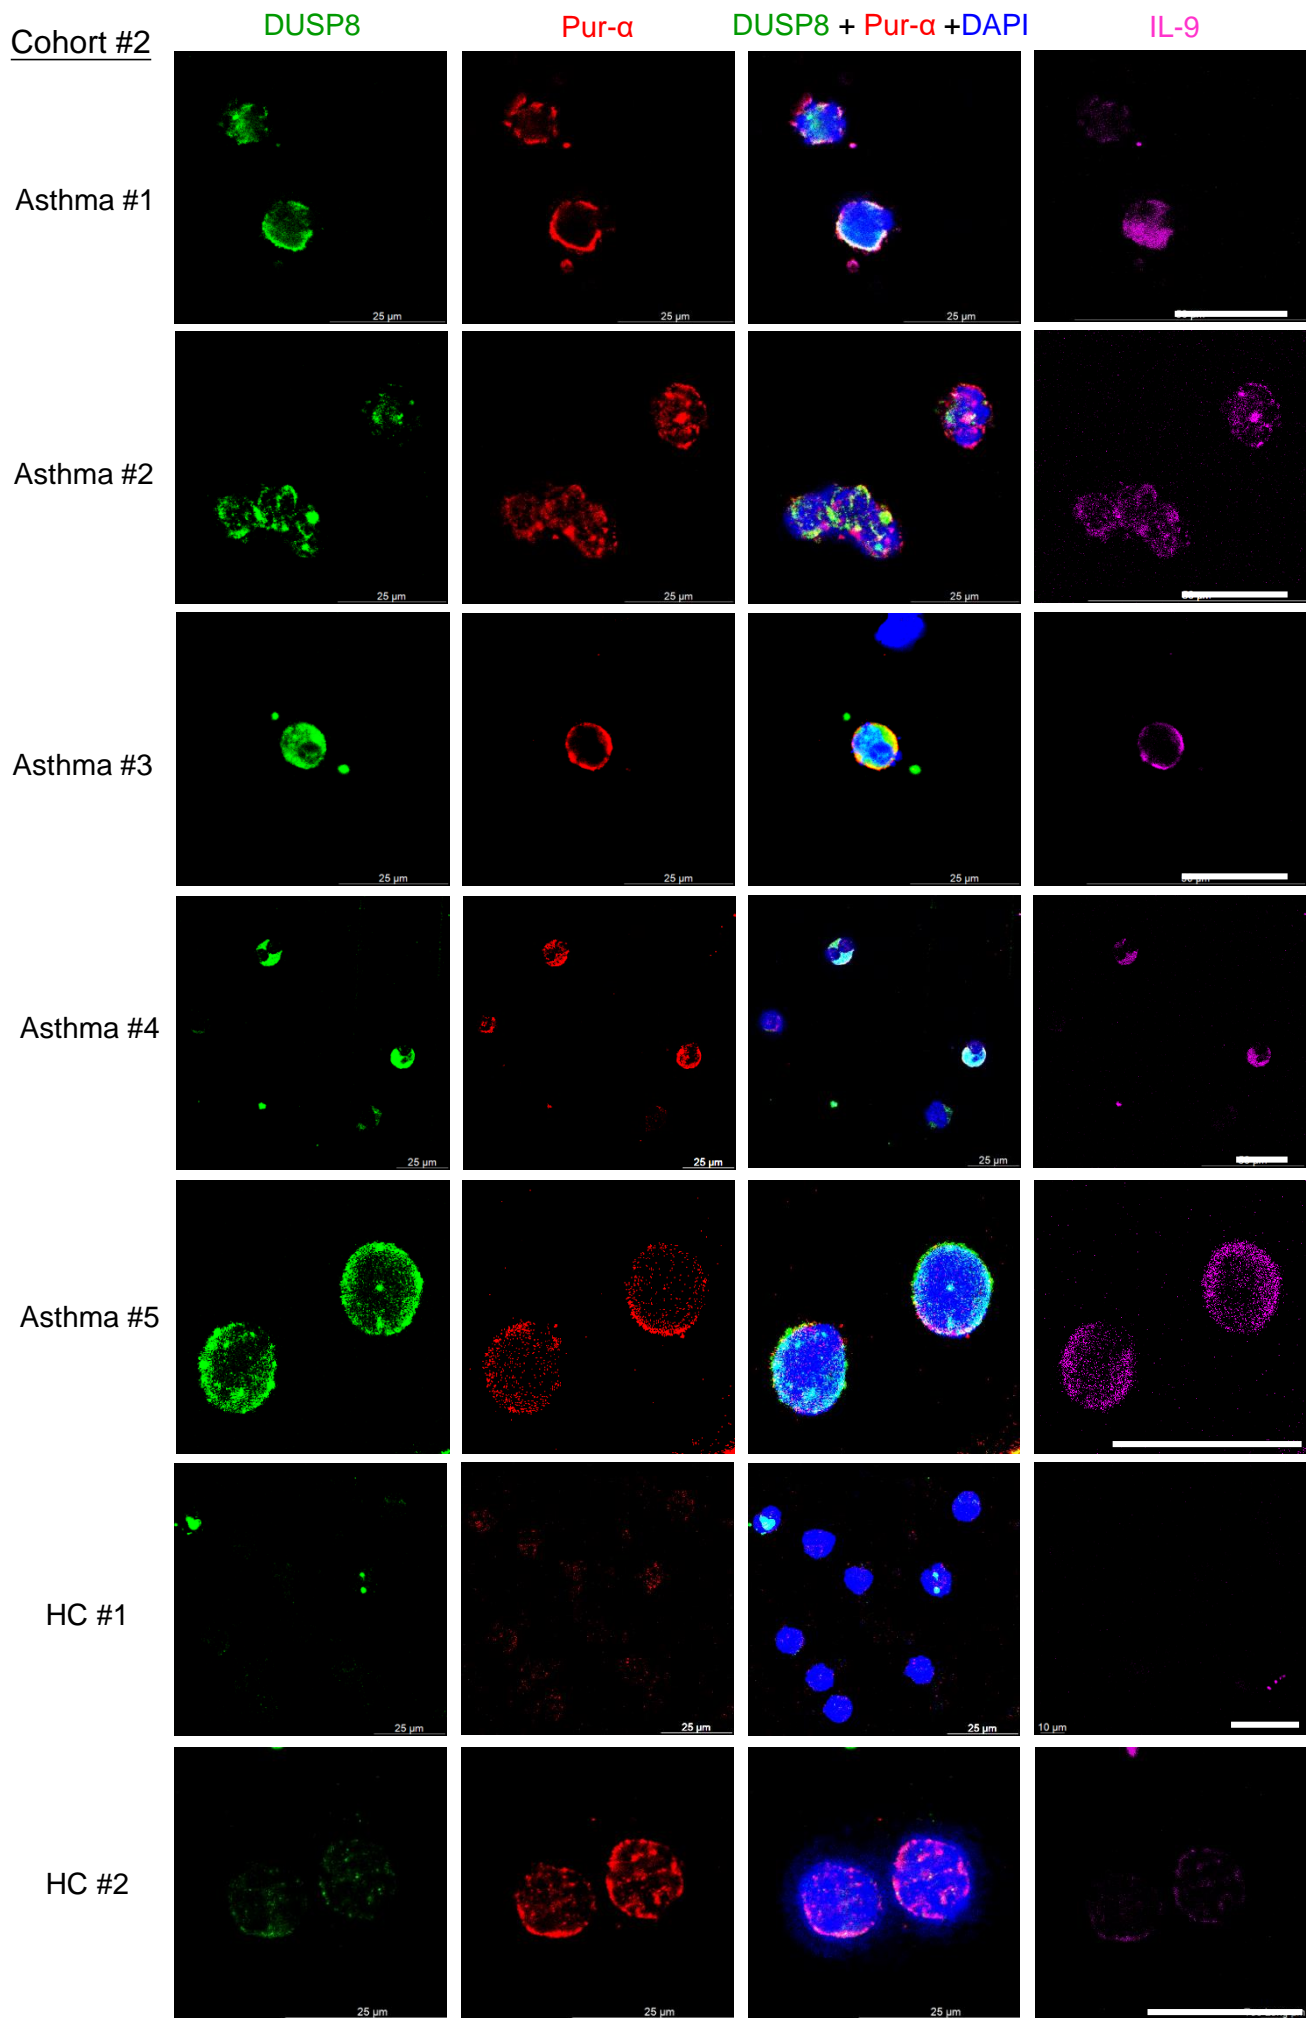

(Continued Supplemental Figure 12)

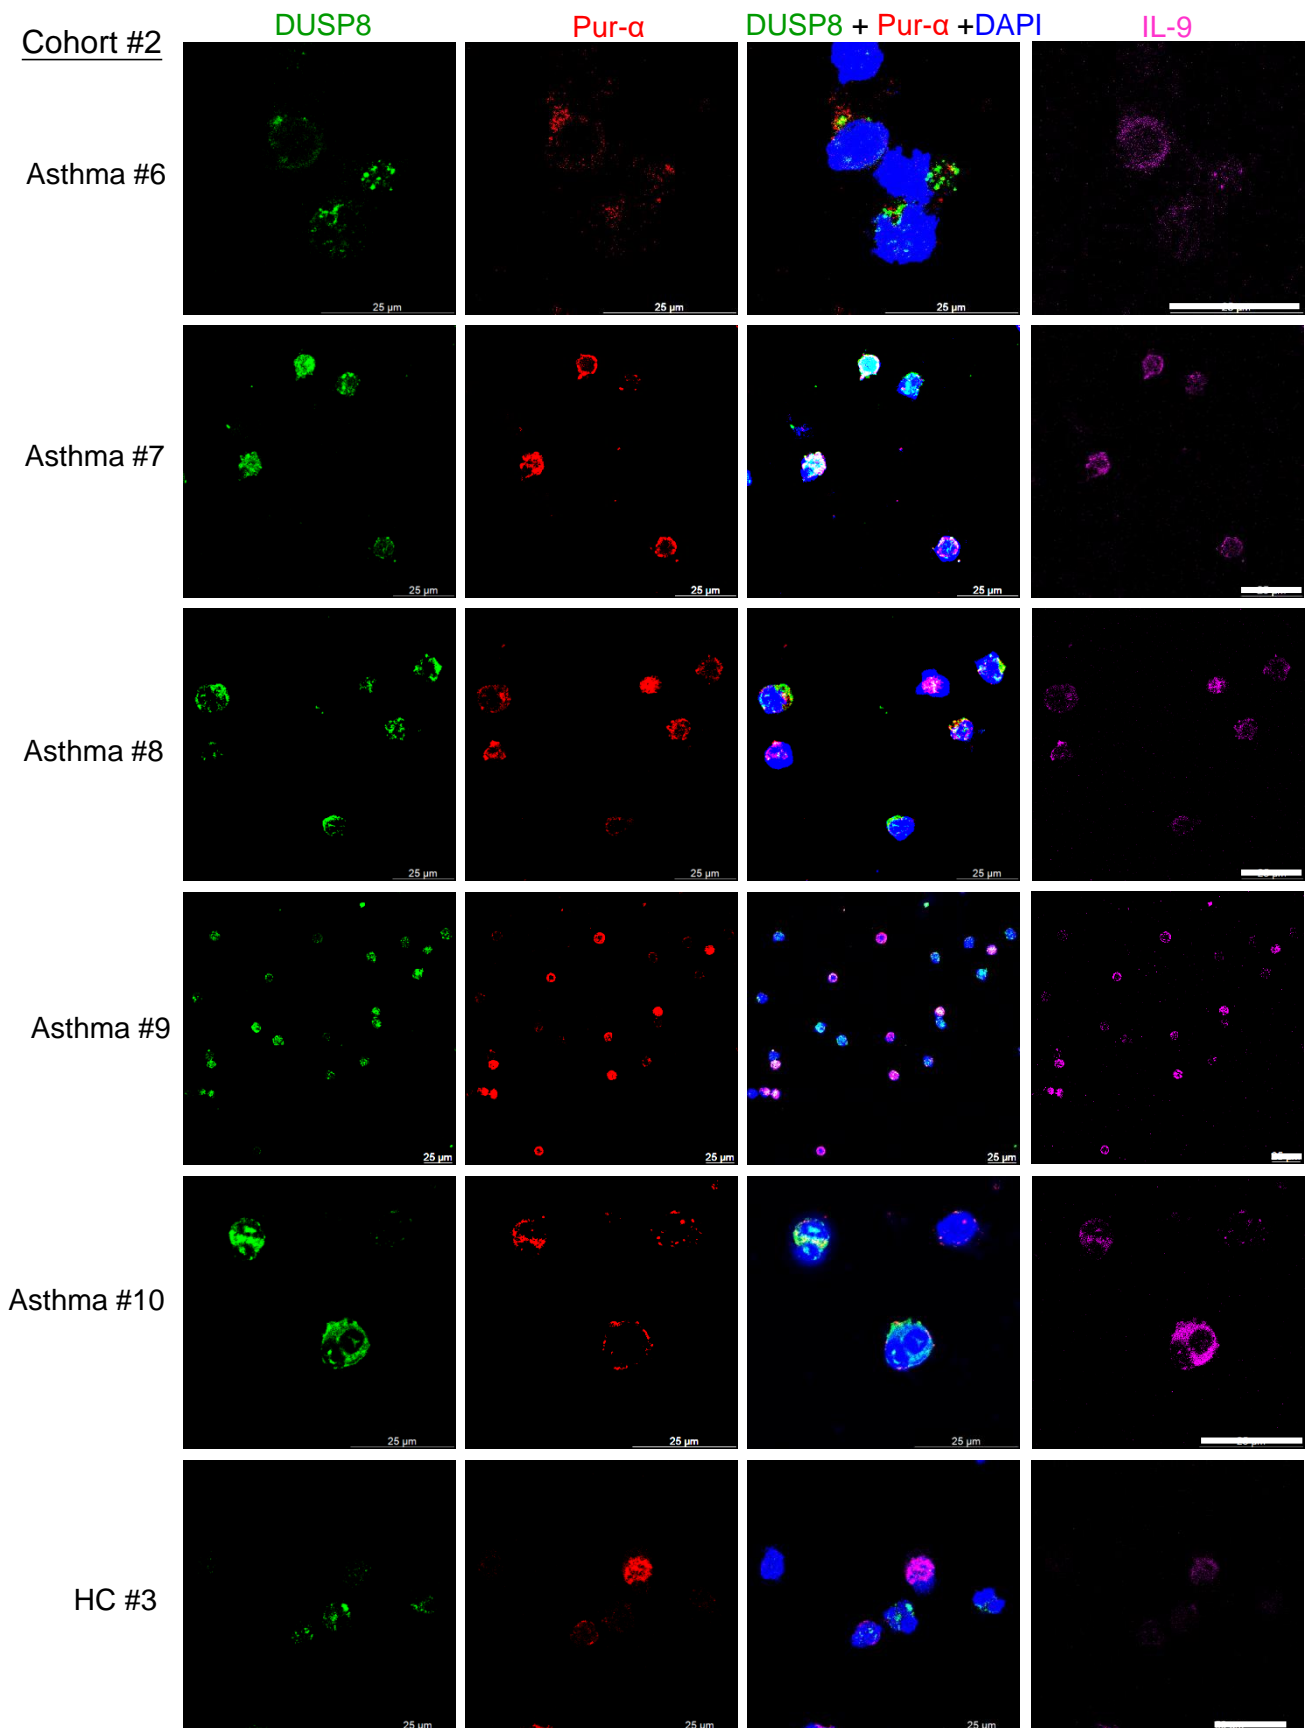



(Continued Supplemental Figure 12)

Cohort #1

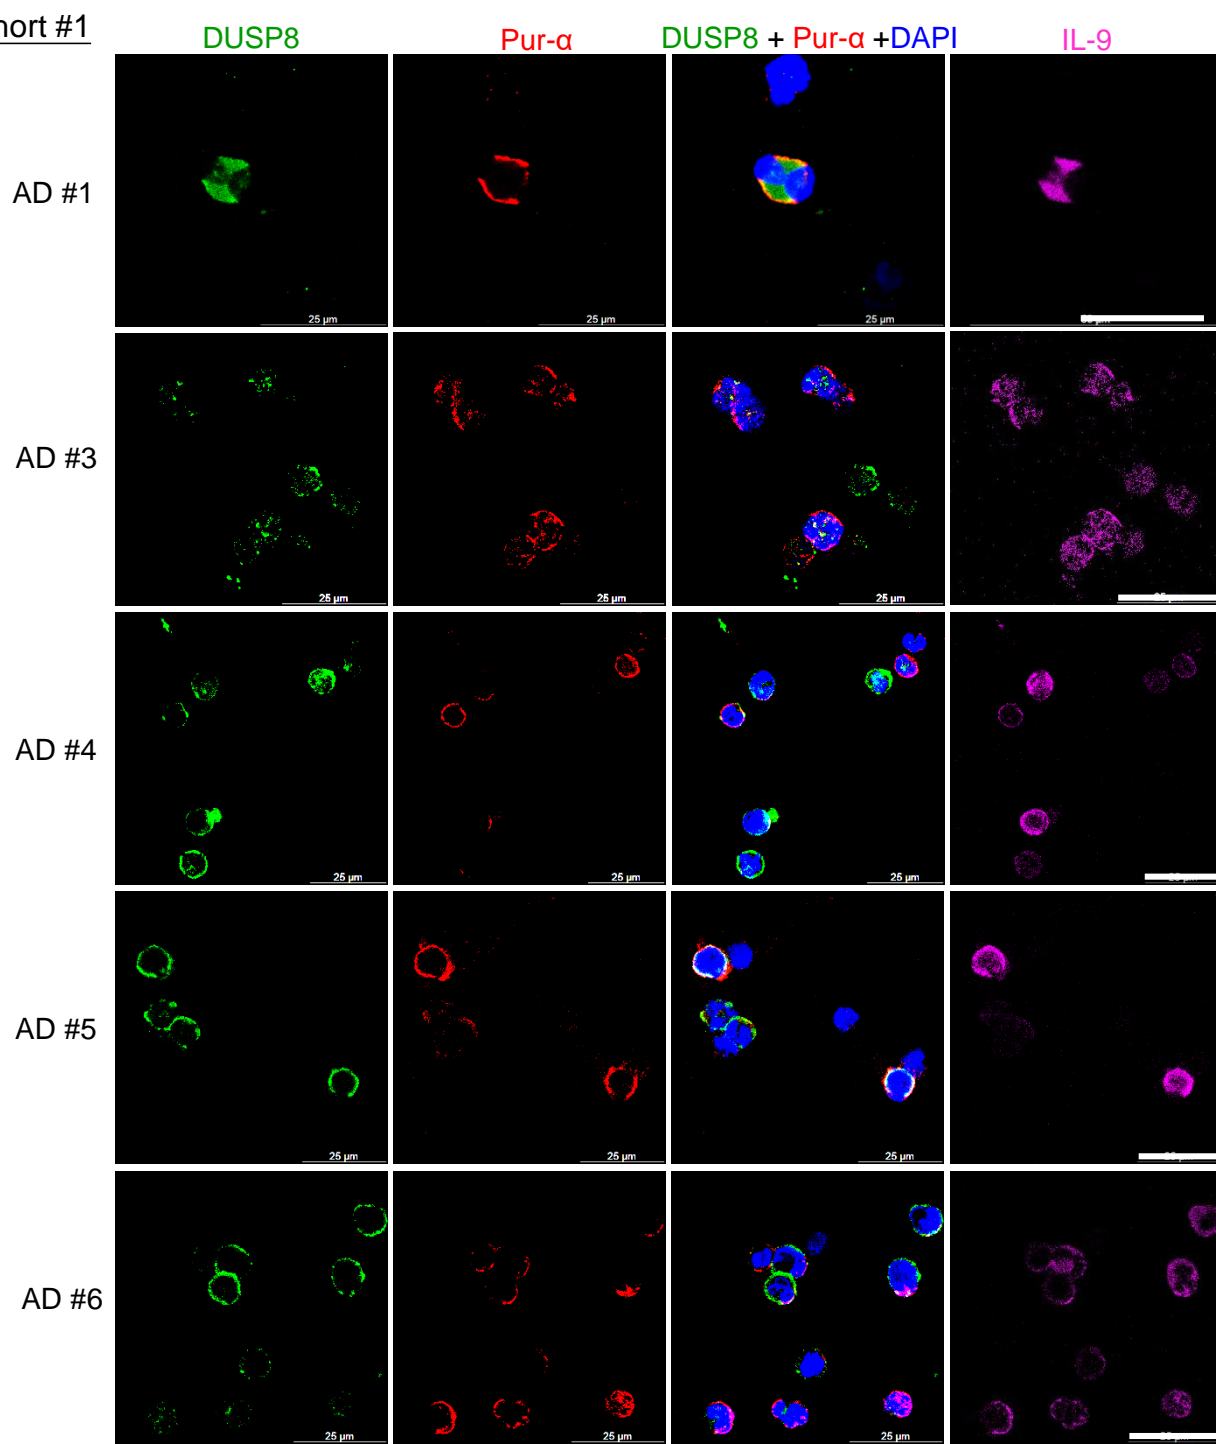

Cohort #2

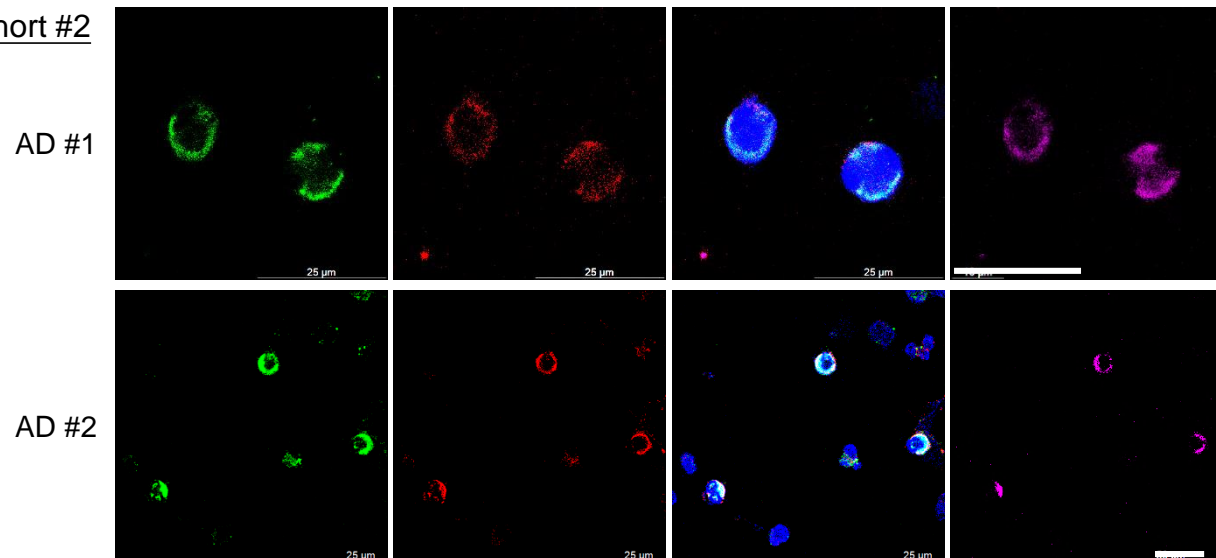

**Supplemental Table 1. Cohort #1 Profile of asthma patients, atopic dermatitis patients, and healthy controls**

| <b>Cohort #1</b>        | <b>Asthma (total n = 16)</b> |                     | <b>HC (total n = 18)</b> |                     | <b>AD (total n = 6)</b> |                   |
|-------------------------|------------------------------|---------------------|--------------------------|---------------------|-------------------------|-------------------|
| <b>Clinical data</b>    | <b>n or Median</b>           | <b>% or (Q1-Q3)</b> | <b>n or Median</b>       | <b>% or (Q1-Q3)</b> | <b>n or Mean</b>        | <b>% or (SEM)</b> |
| Female, n               | n = 10                       | 62.5%               | n = 18                   | 100%                | n = 2                   | 33.3%             |
| Age (year-old)          | 41                           | (34.5-47.5)         | 32.0                     | (24.0-39.0)         | 20.8                    | 3.26              |
| ACT                     | 23.5                         | (23-24)             | N/A                      |                     | N/A                     |                   |
| Atopic dermatitis       | n = 4                        | 25.0%               | N/A                      |                     | N/A                     |                   |
| Allergic rhinitis       | n = 7                        | 43.8%               | N/A                      |                     | N/A                     |                   |
| Allergic conjunctivitis | n = 1                        | 6.3%                | N/A                      |                     | N/A                     |                   |
| IgE (IU/ml)             | 120.6                        | (39.3-324.8)        | N/A                      |                     | 3517.0                  | 1382.5            |
| EASI                    | N/A                          |                     | N/A                      |                     | 18.34                   | 8.09              |

HC, healthy controls; AD, atopic dermatitis; Q1, the first quartile; Q3, the third quartile; SEM, standard error of the mean; N/A, not applicable; ACT, asthma control test; EASI, eczema area and severity index.

**Supplemental Table 2. Cohort #2 Profile of asthma patients, atopic dermatitis patients, and healthy controls**

| Cohort #2      | Asthma (total n = 11) |              | HC (total n = 5) |              | AD (total n = 2) |            |
|----------------|-----------------------|--------------|------------------|--------------|------------------|------------|
|                | n or Median           | % or (Q1-Q3) | n or Median      | % or (Q1-Q3) | n or Mean        | % or (SEM) |
| Female, n      | n = 8                 | 72.7%        | n = 3            | 60.0%        | 0                | 0%         |
| Age (year-old) | 46                    | (38.0-50.5)  | 37.0             | (31.0-39.0)  | 27.5             | 15.5       |
| ACT            | 21.0                  | (20.0-22.5)  | N/A              |              | N/A              |            |
| IgE (IU/ml)    | 171.0                 | (36.8-200.0) | N/A              |              | 2813             | 2187       |
| EASI           | N/A                   |              | N/A              |              | 6.05             | 3.15       |

HC, healthy controls; AD, atopic dermatitis; Q1, the first quartile; Q3, the third quartile; SEM, standard error of the mean; N/A, not applicable; ACT, asthma control test; EASI, eczema area and severity index.
